# Supplementary material for: Comparative Framework Linking Some Capabilities of Small Array Dispositions of Generic Points Absorbers
Source: Preprints.org preprint supplement (doi:10.20944/preprints201708.0025.v1), 2017-08-07
Supplement: Supplementary file 23 [file supplementary]

**Regular  
Waves**

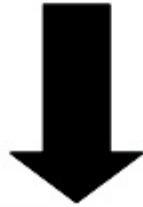

**1 Floater**

**1. Data Analysis**

**2. Time Domain Hydrodynamics**

**3. Post-Processing:** Evaluation, Measurements vs. Data analysis comparison

**4. Evaluation:** according to Modelling results

**5. Optimization fronts (2. & 4.)**

**n Floaters**
