# Supplementary figures and images for: Comparative Framework Linking Some Capabilities of Small Array Dispositions of Generic Points Absorbers
Source: Preprints.org preprint supplement (doi:10.20944/preprints201708.0025.v1), 2017-08-07

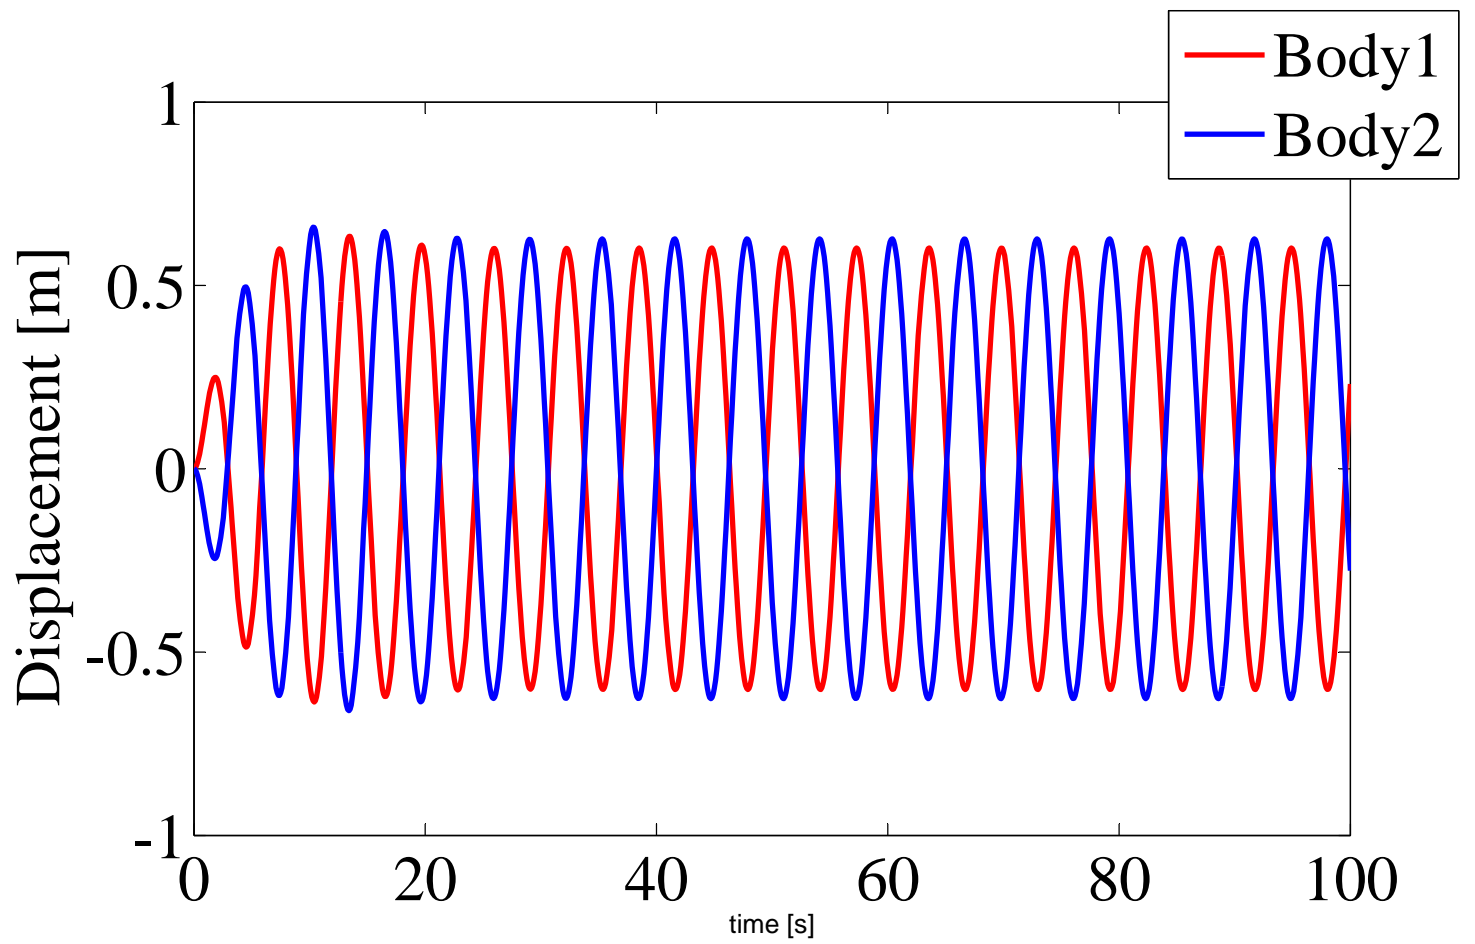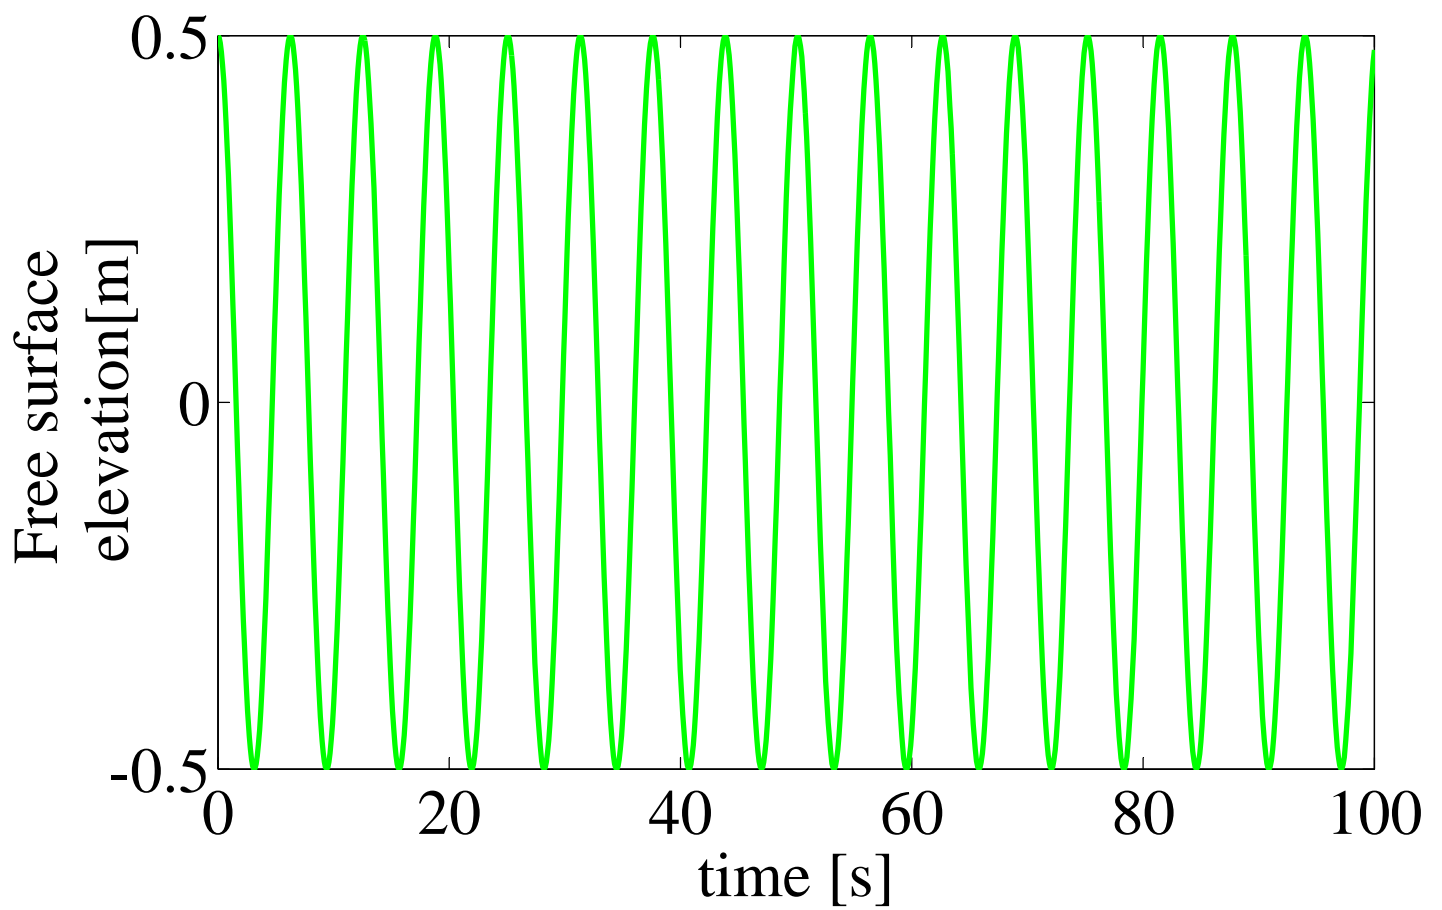

Supplement: Supplementary file 1 [file supplementary]

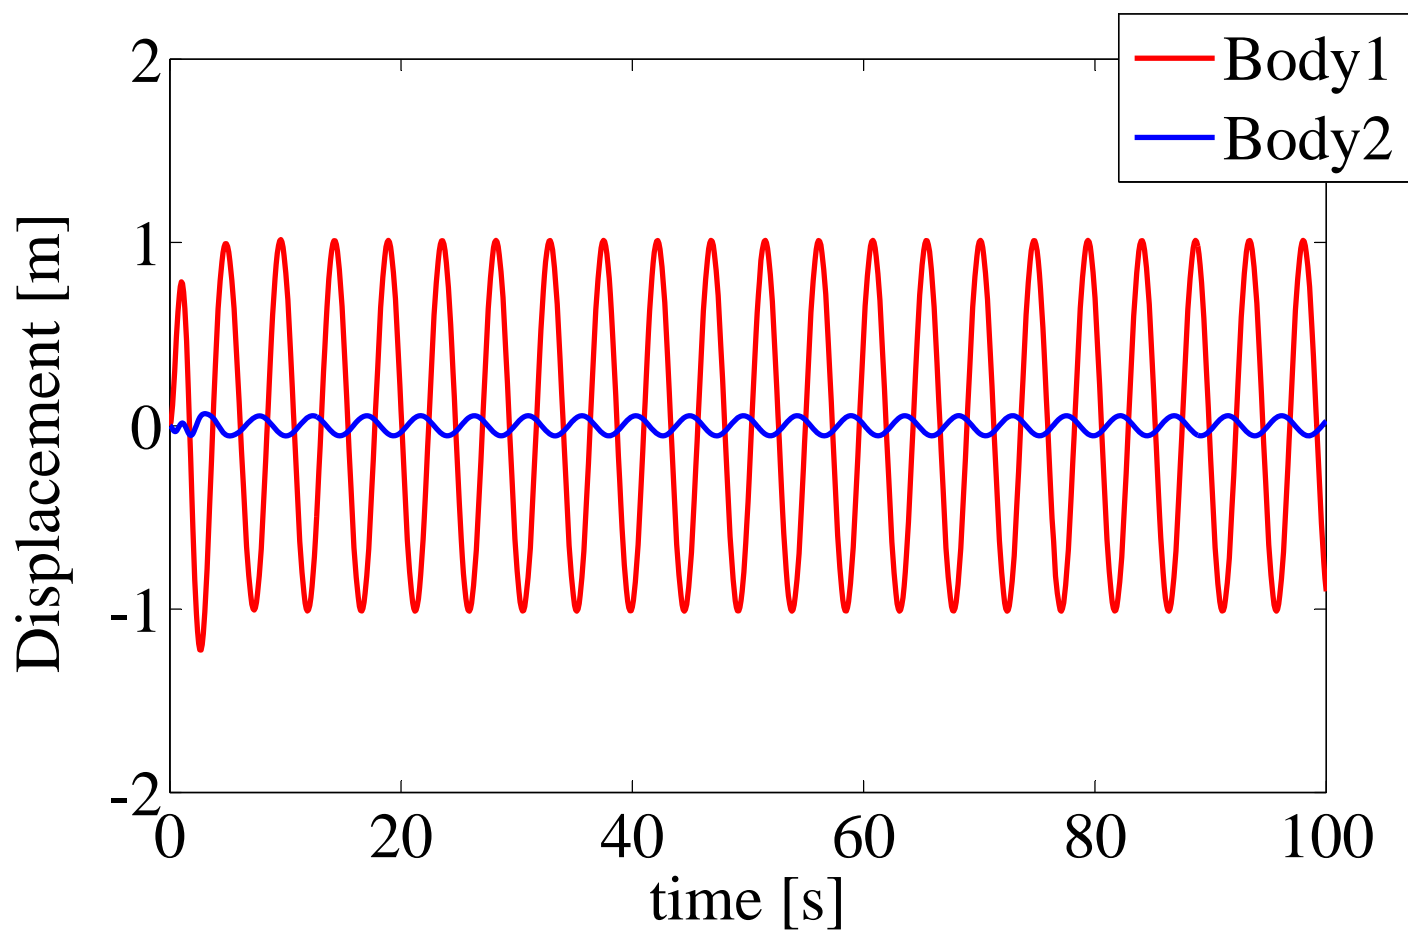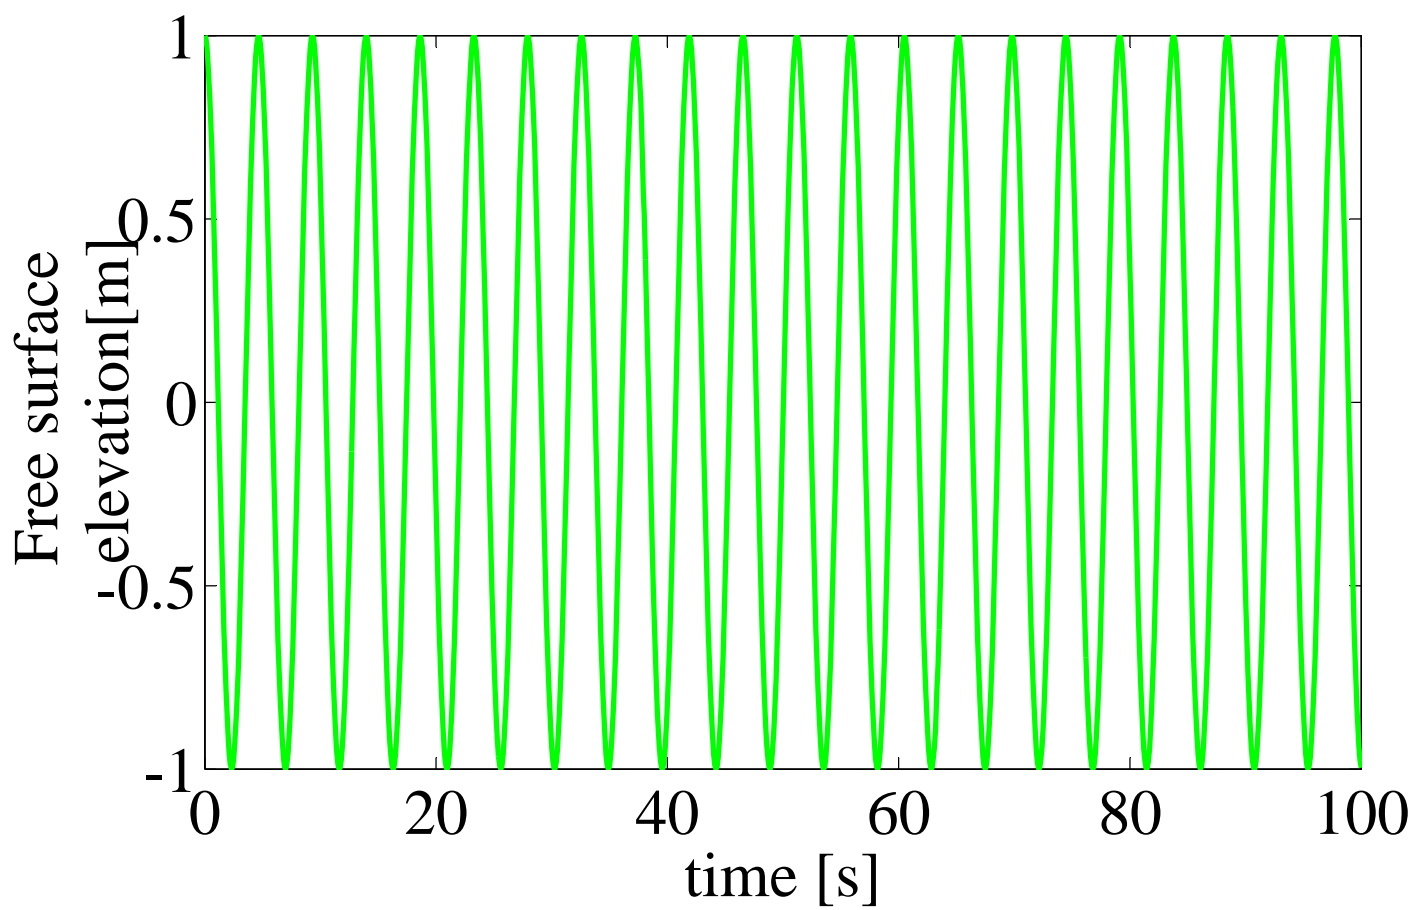

Supplement: Supplementary file 2 [file supplementary]

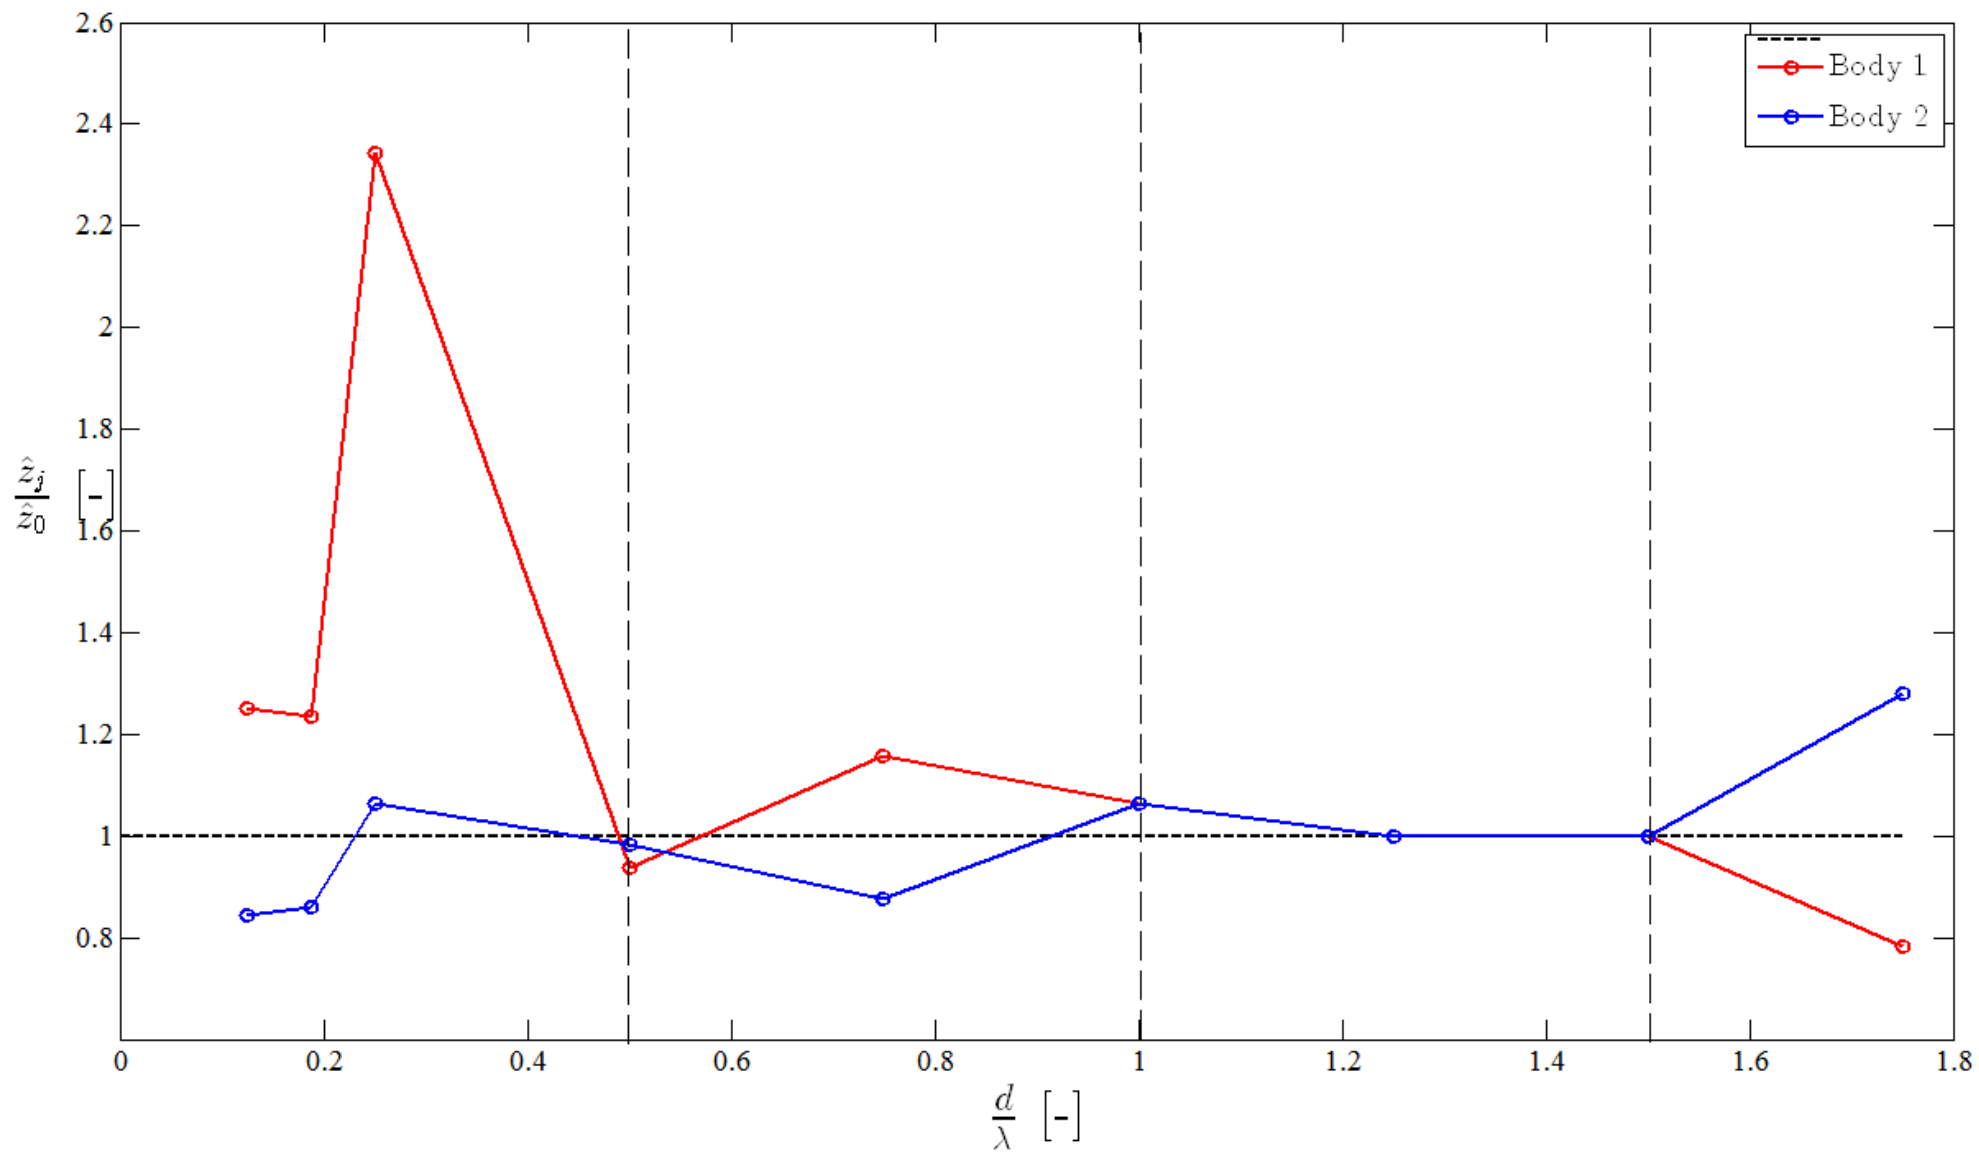

Supplement: Supplementary file 3 [file supplementary]

Surge motion (11)

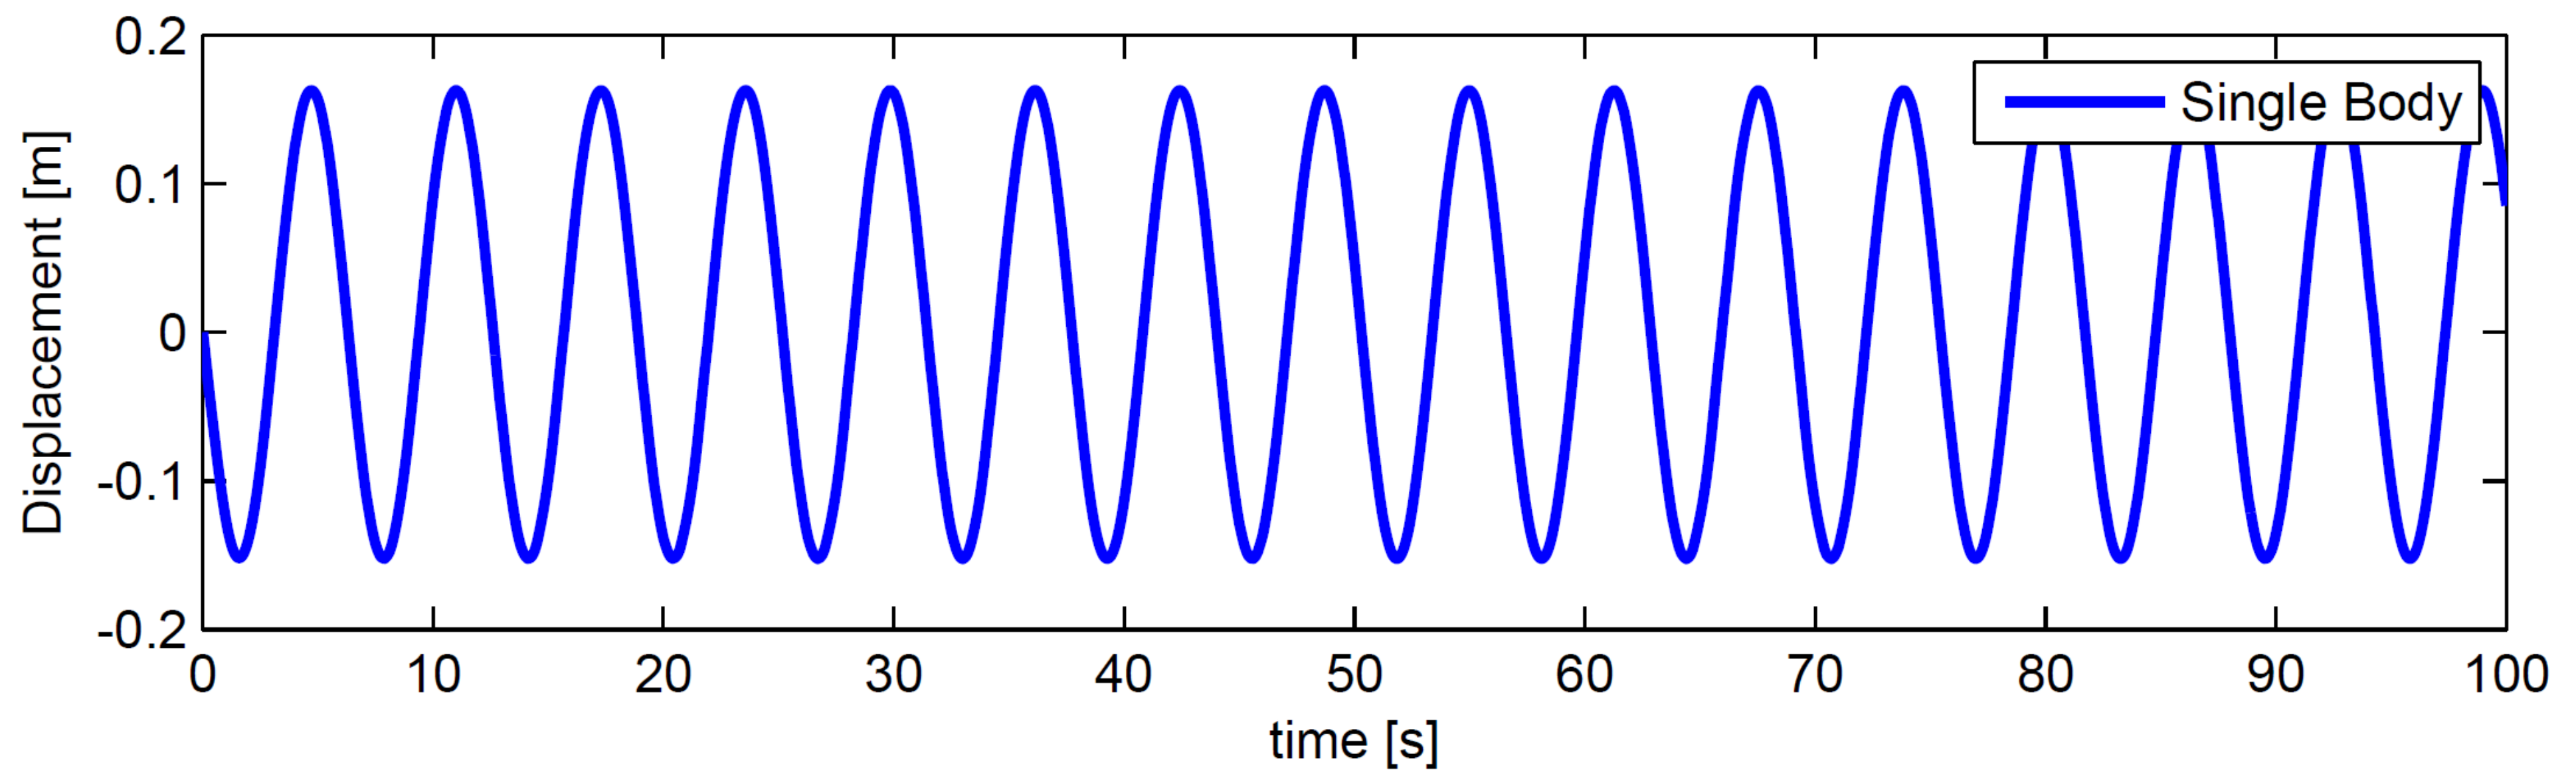

Heave motion (33)

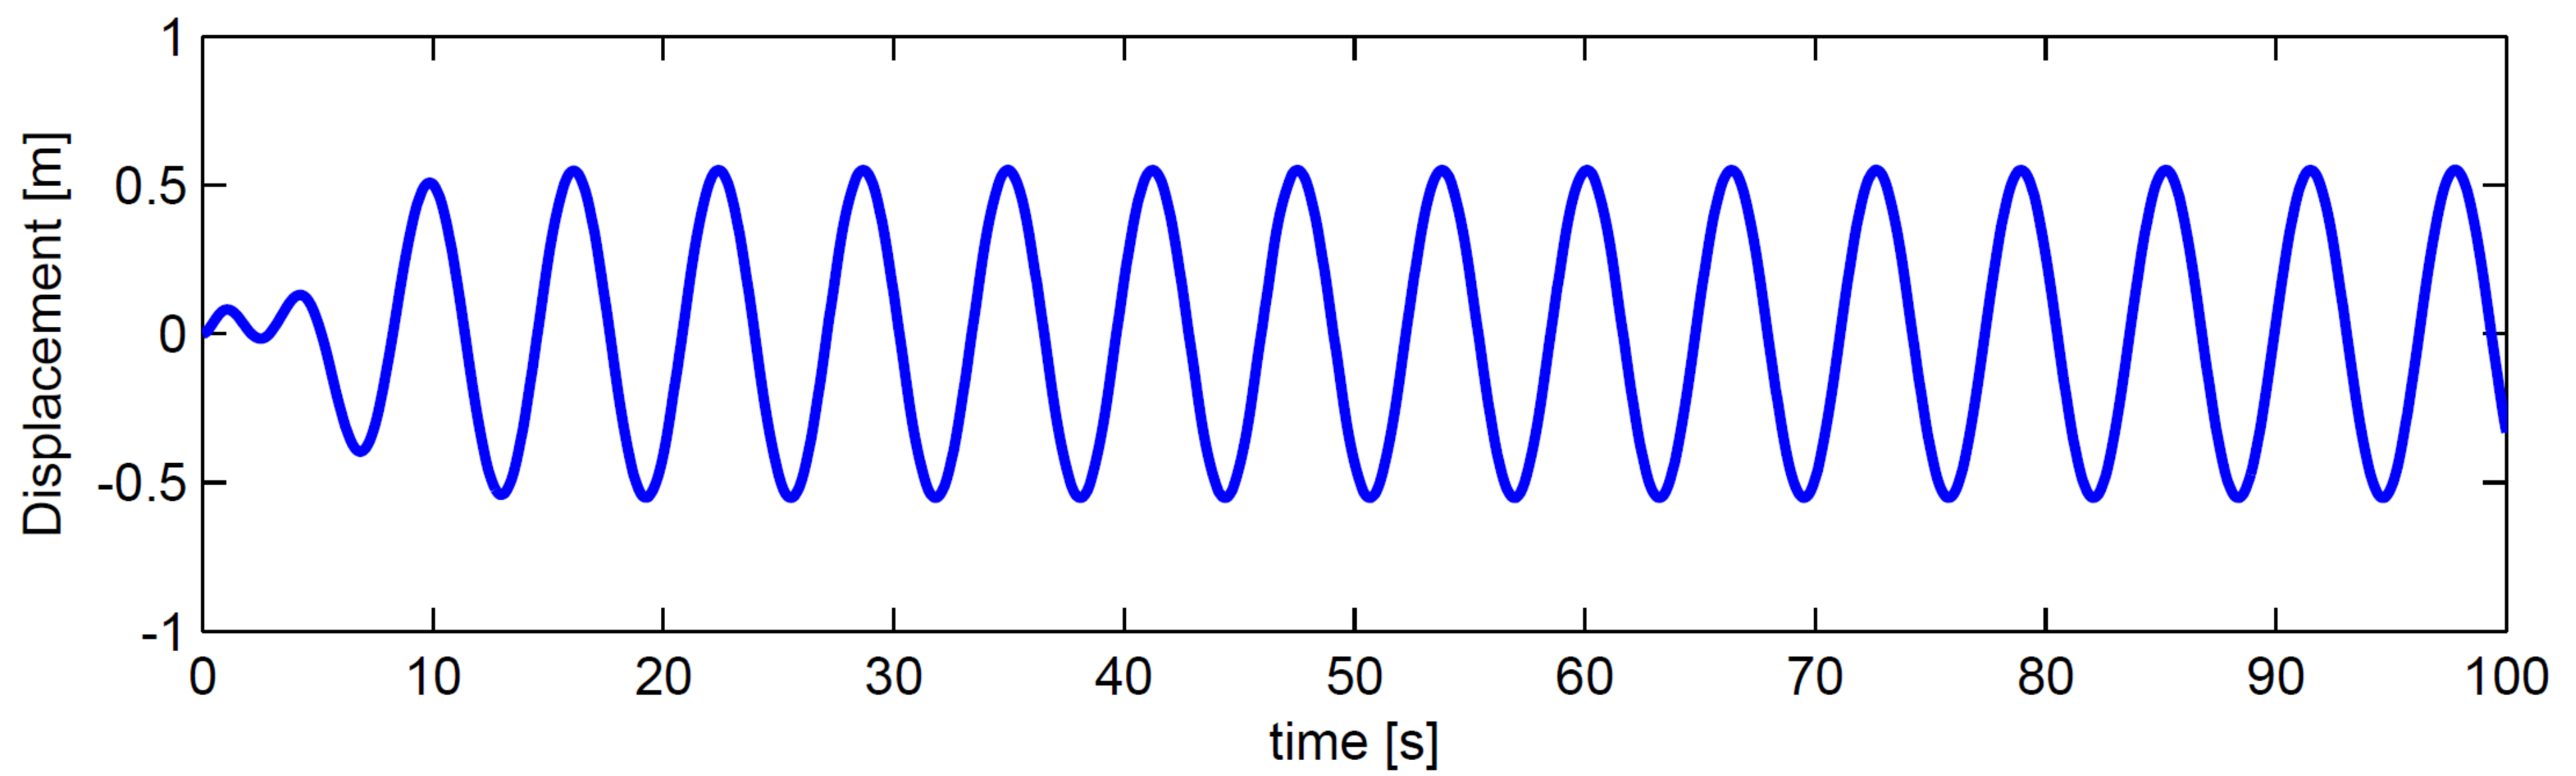

Pitch motion (55)

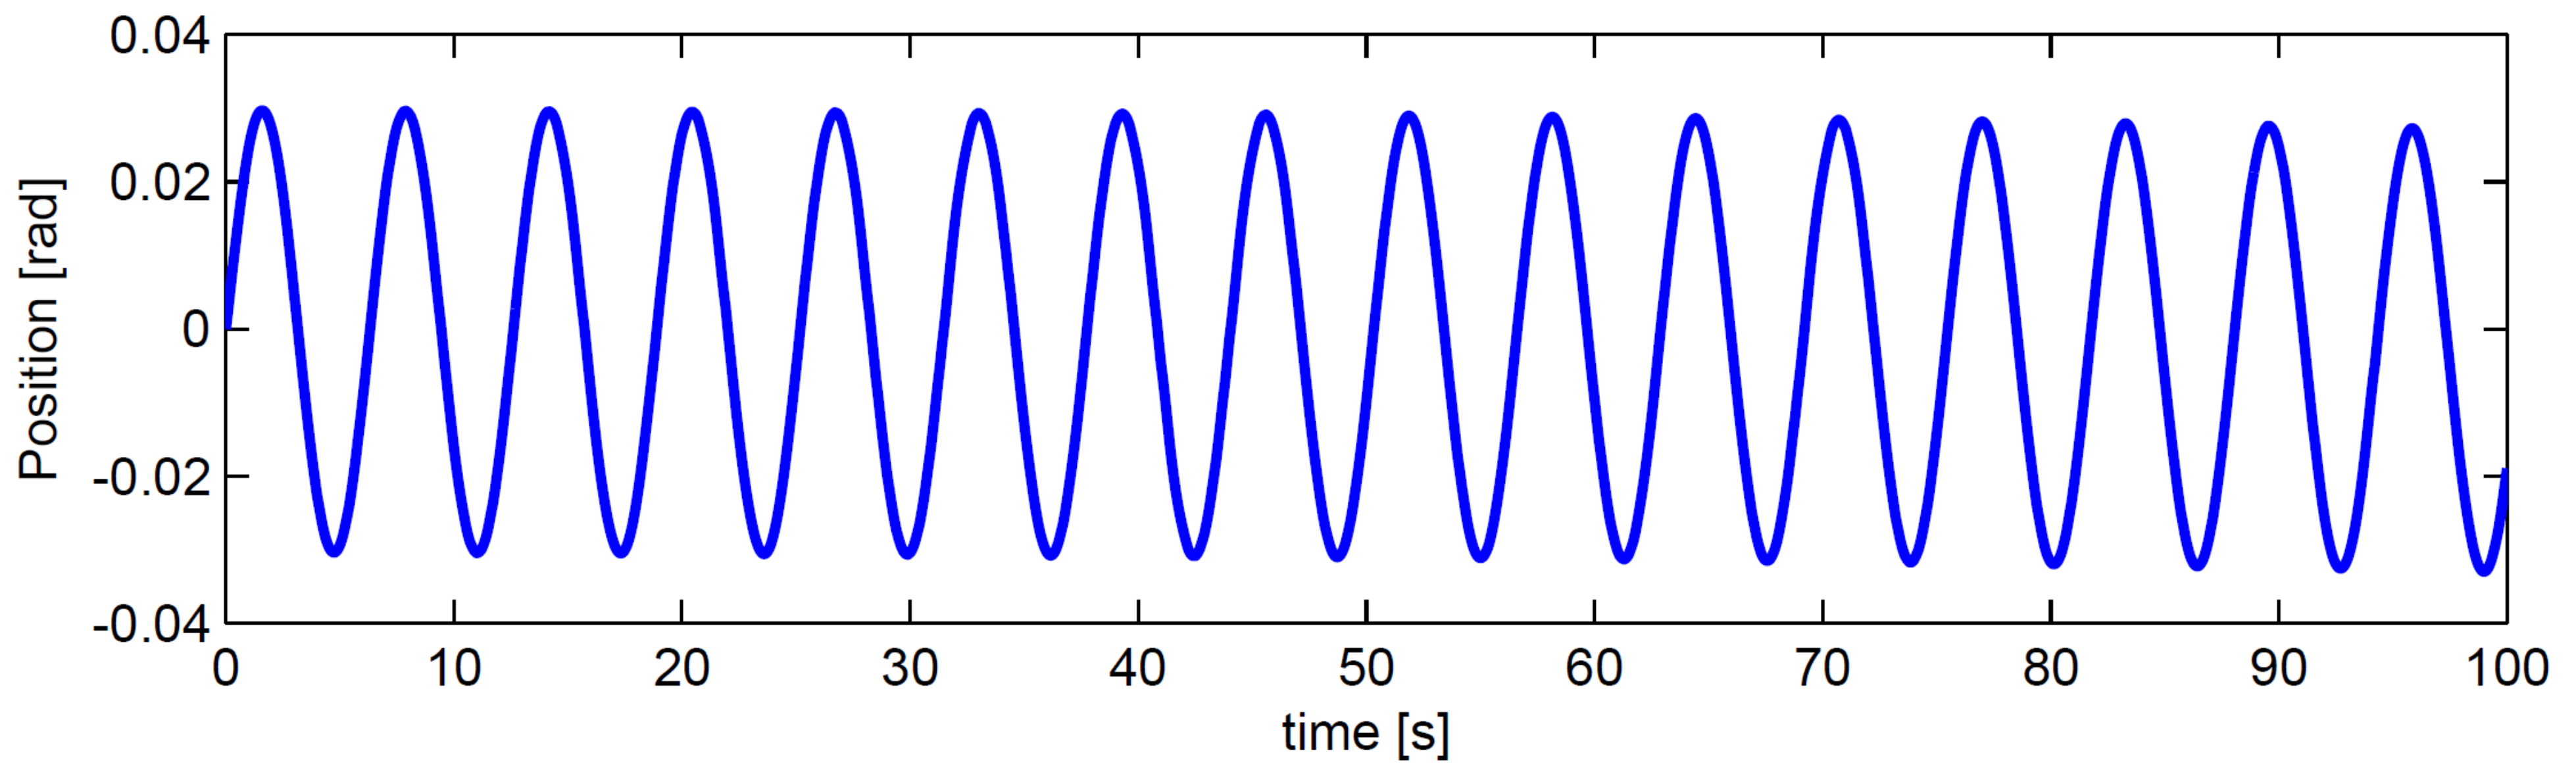

Free Surface Elevation

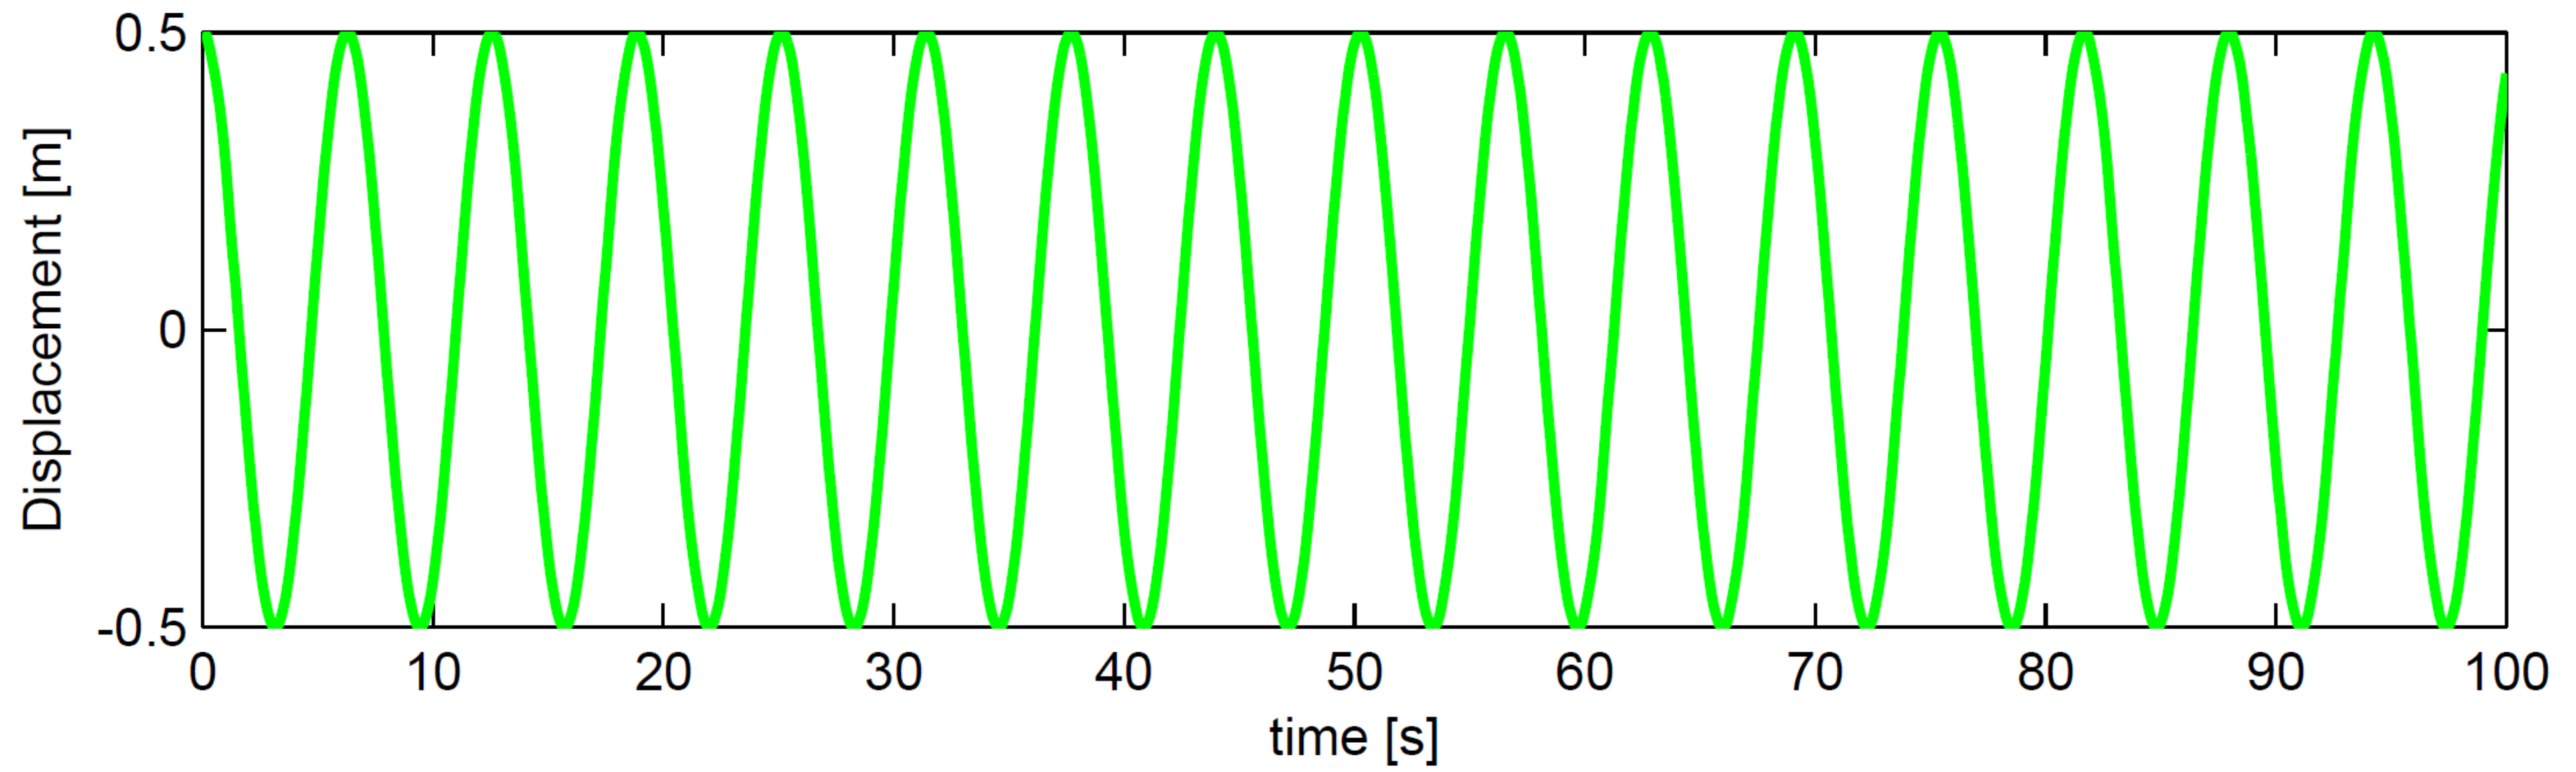

Supplement: Supplementary file 4 [file supplementary]

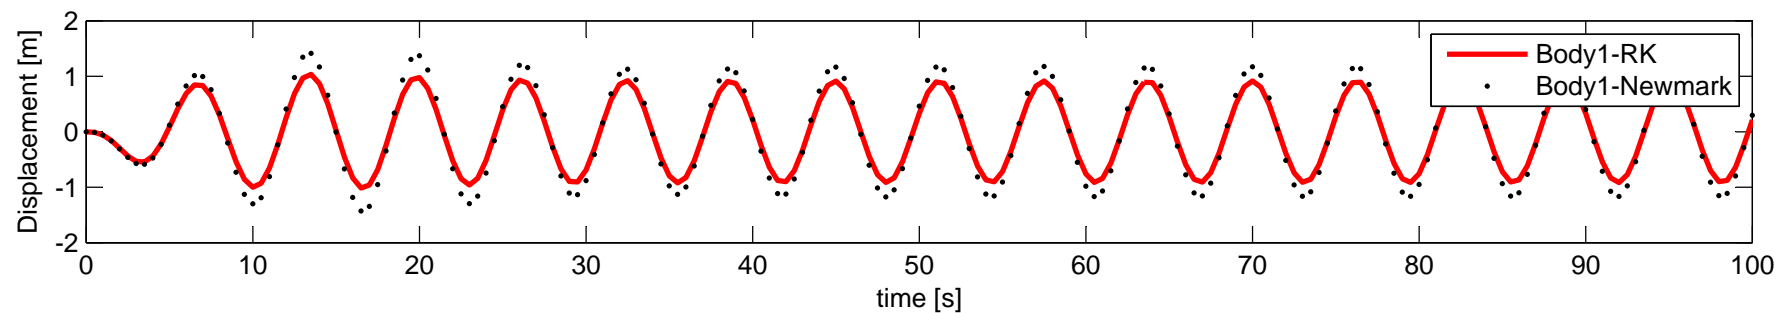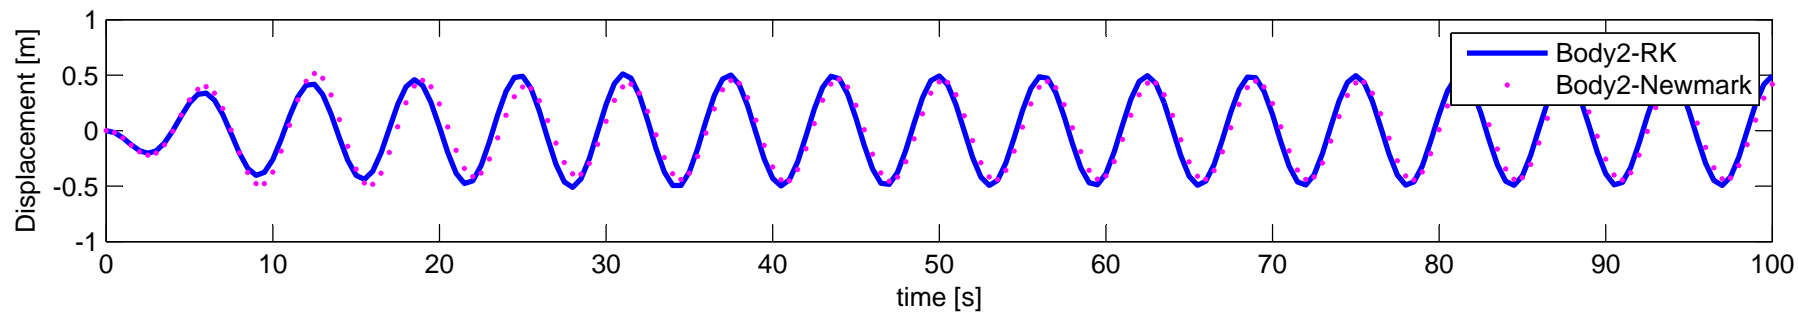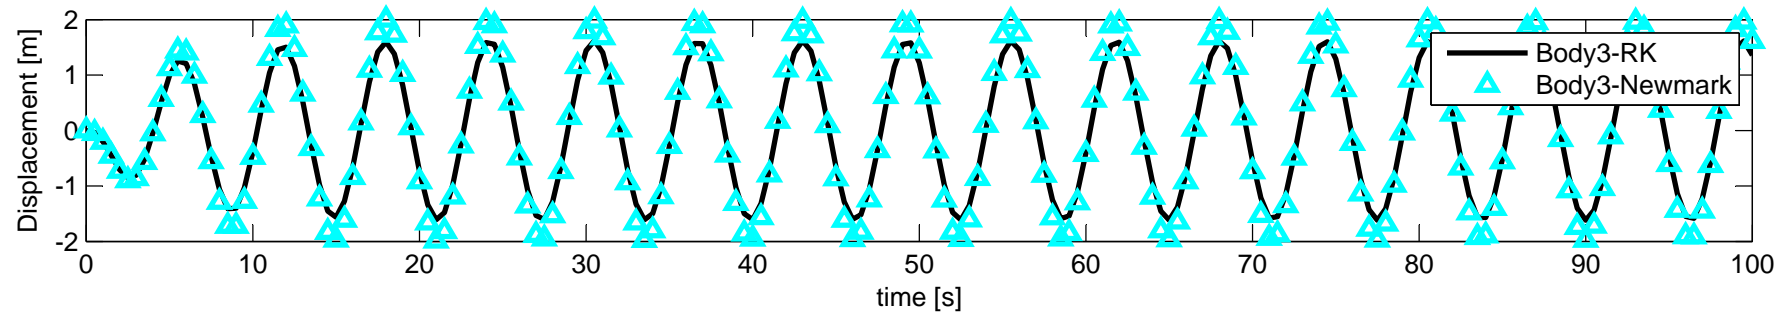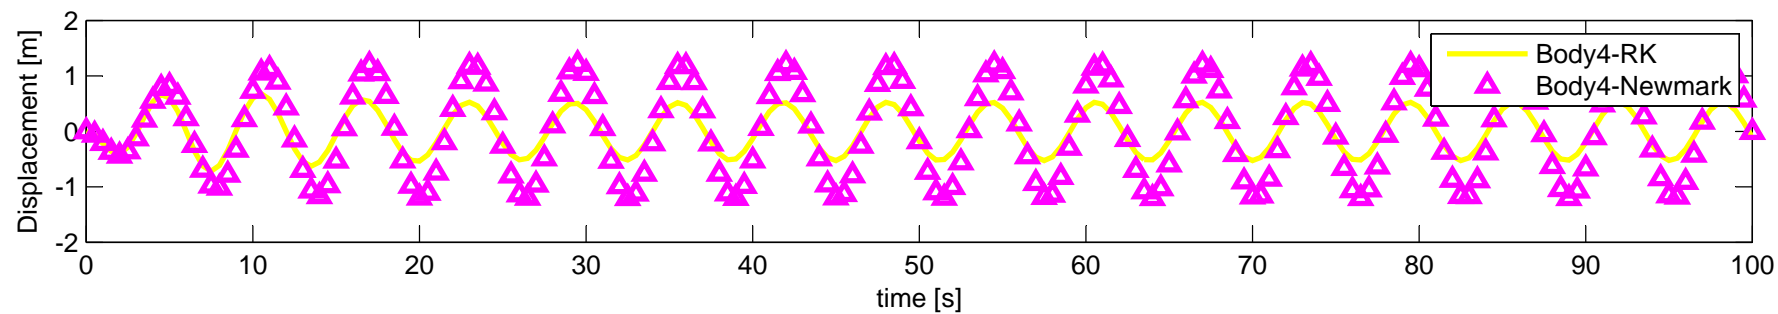

Supplement: Supplementary file 5 [file supplementary]

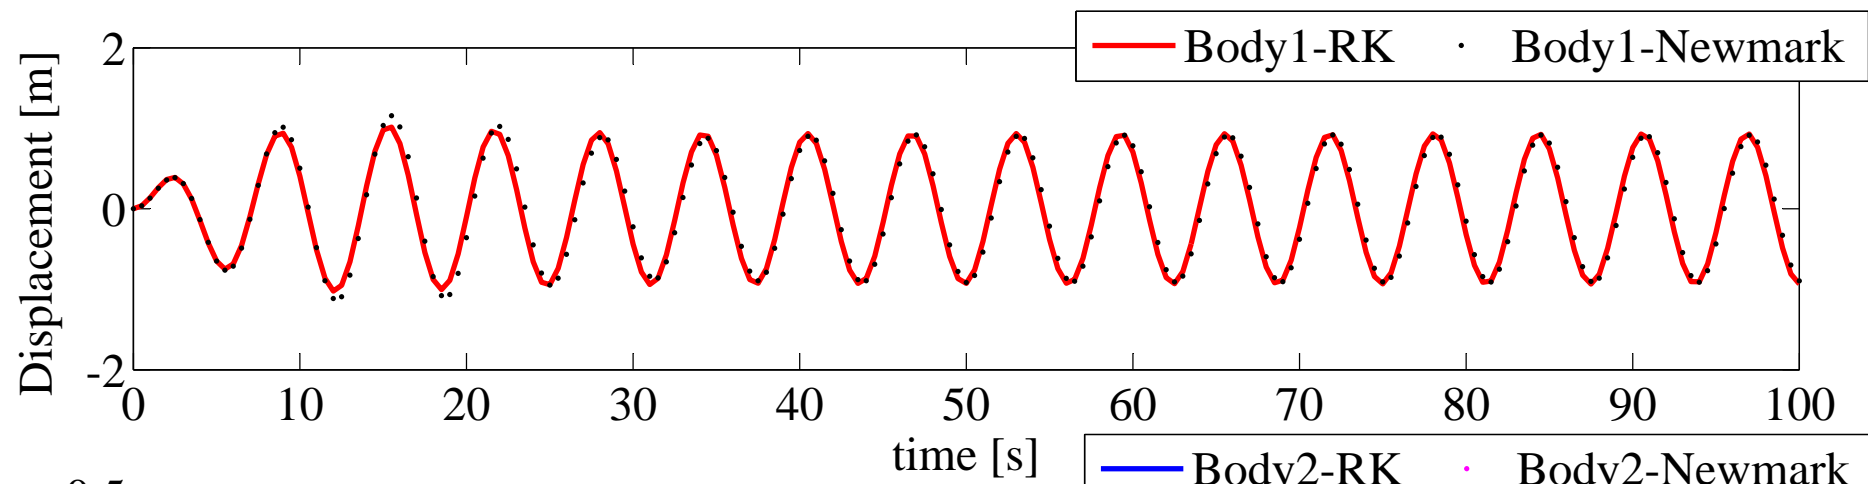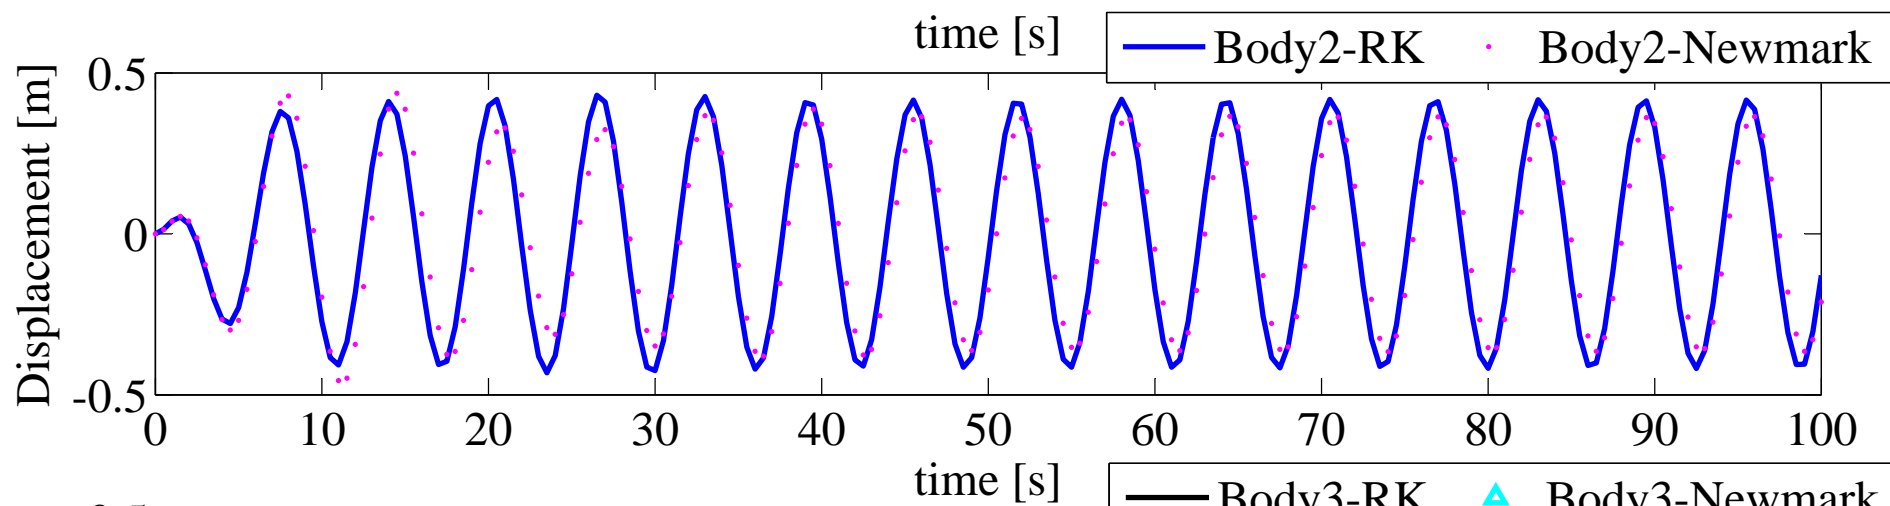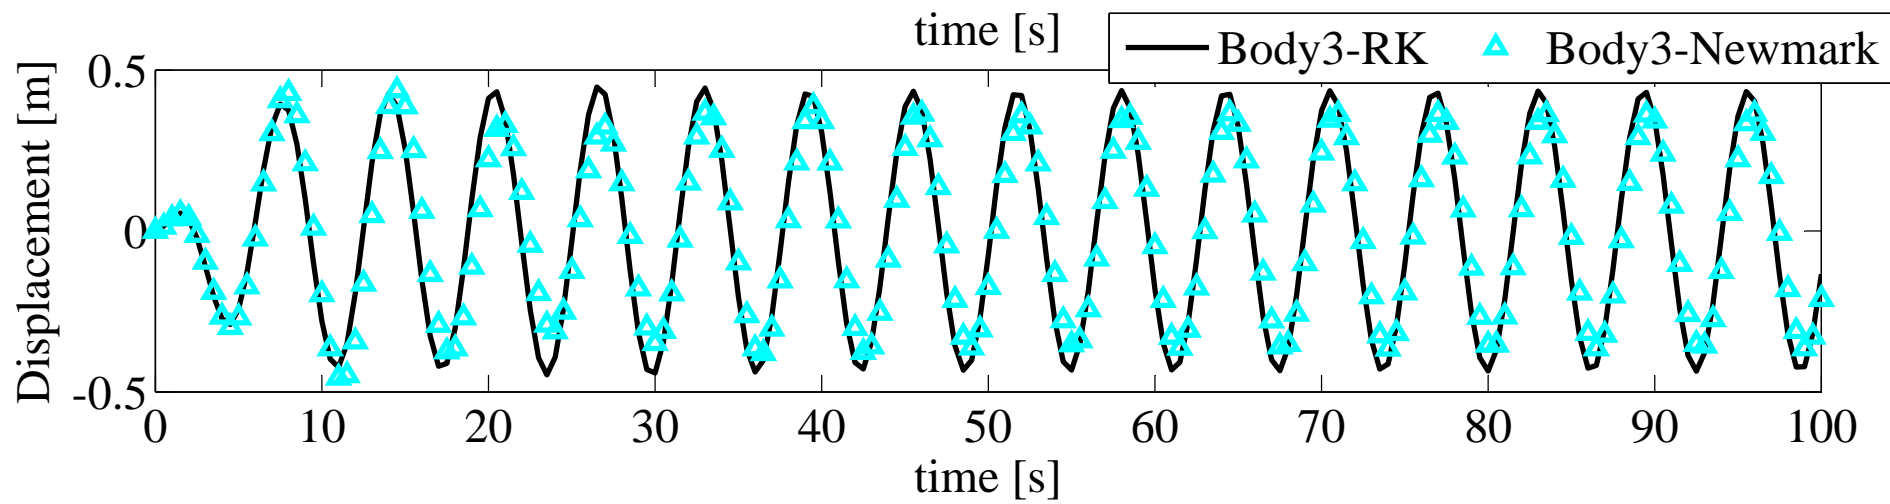

Supplement: Supplementary file 6 [file supplementary]

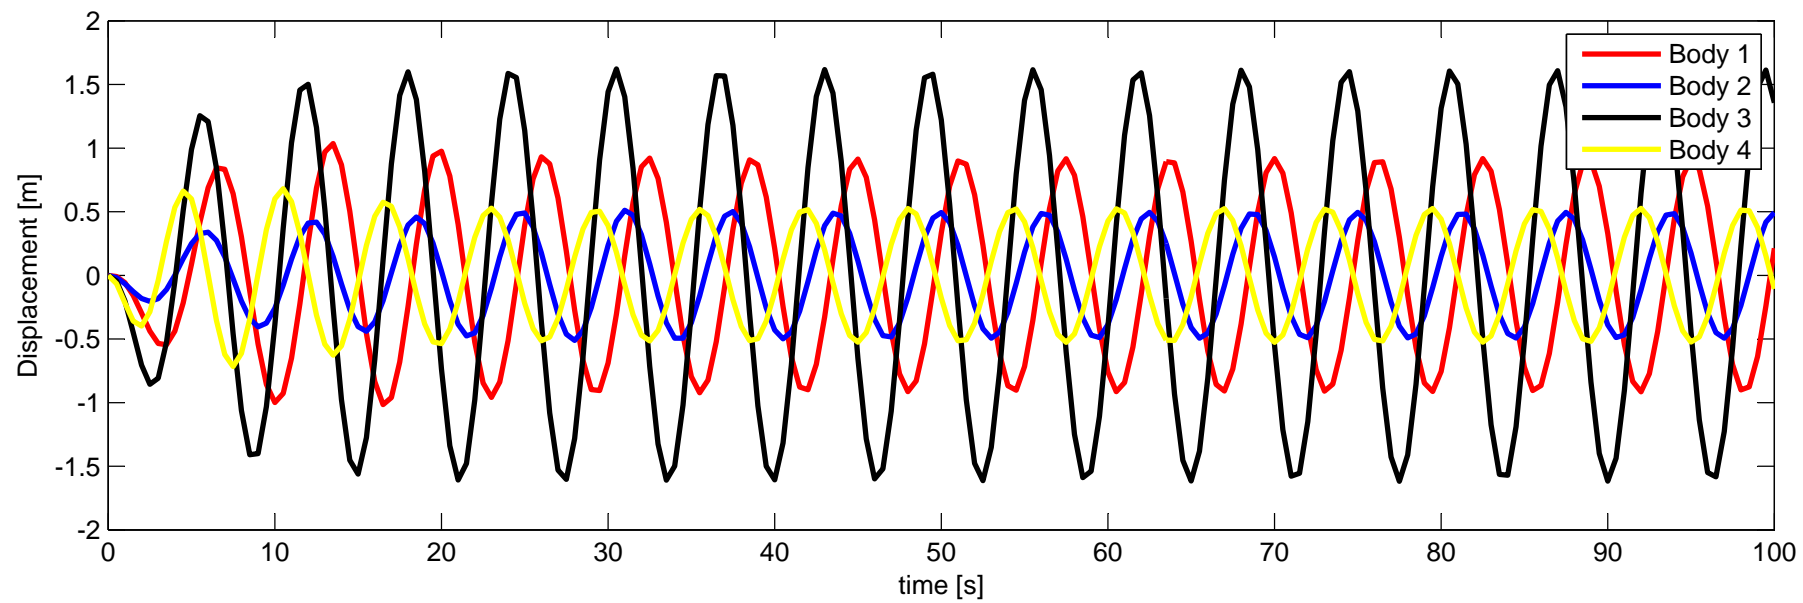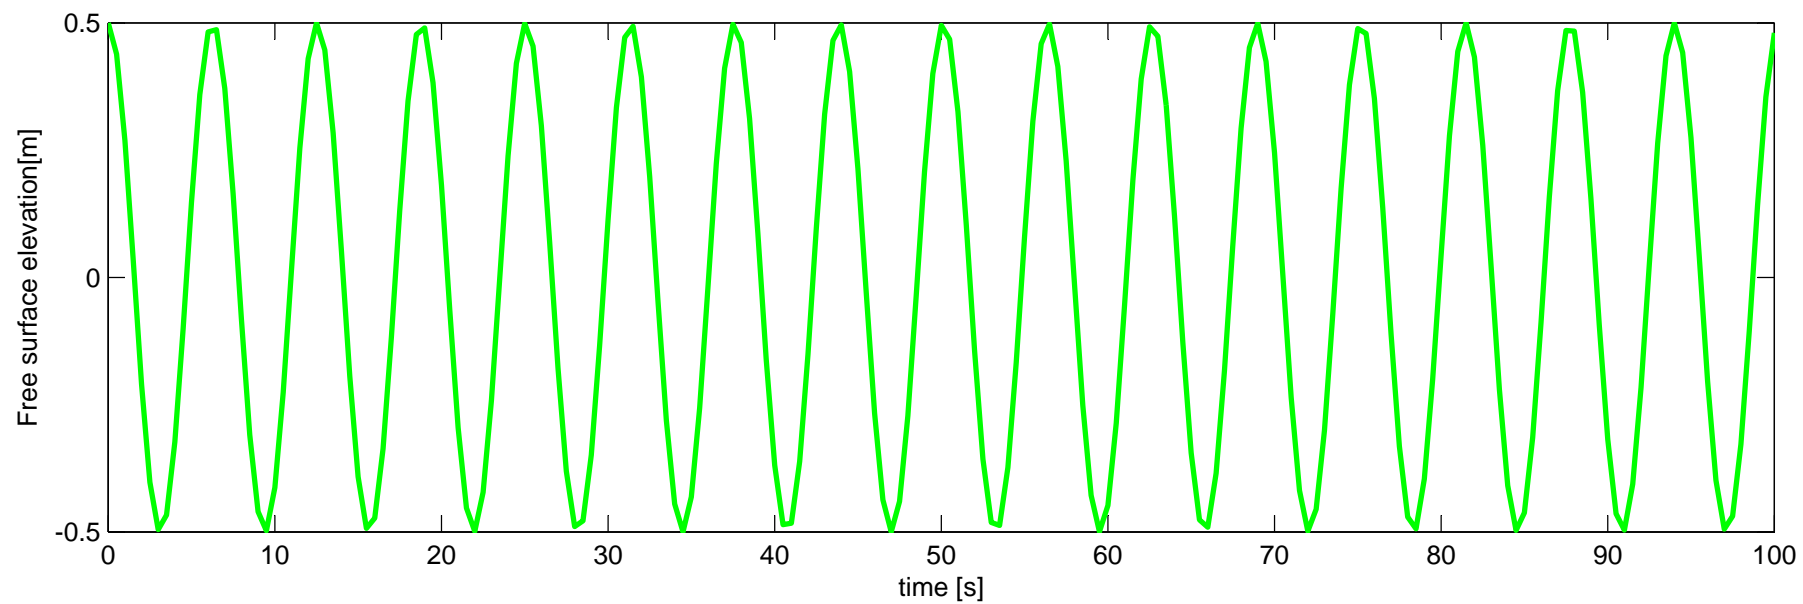

Supplement: Supplementary file 7 [file supplementary]

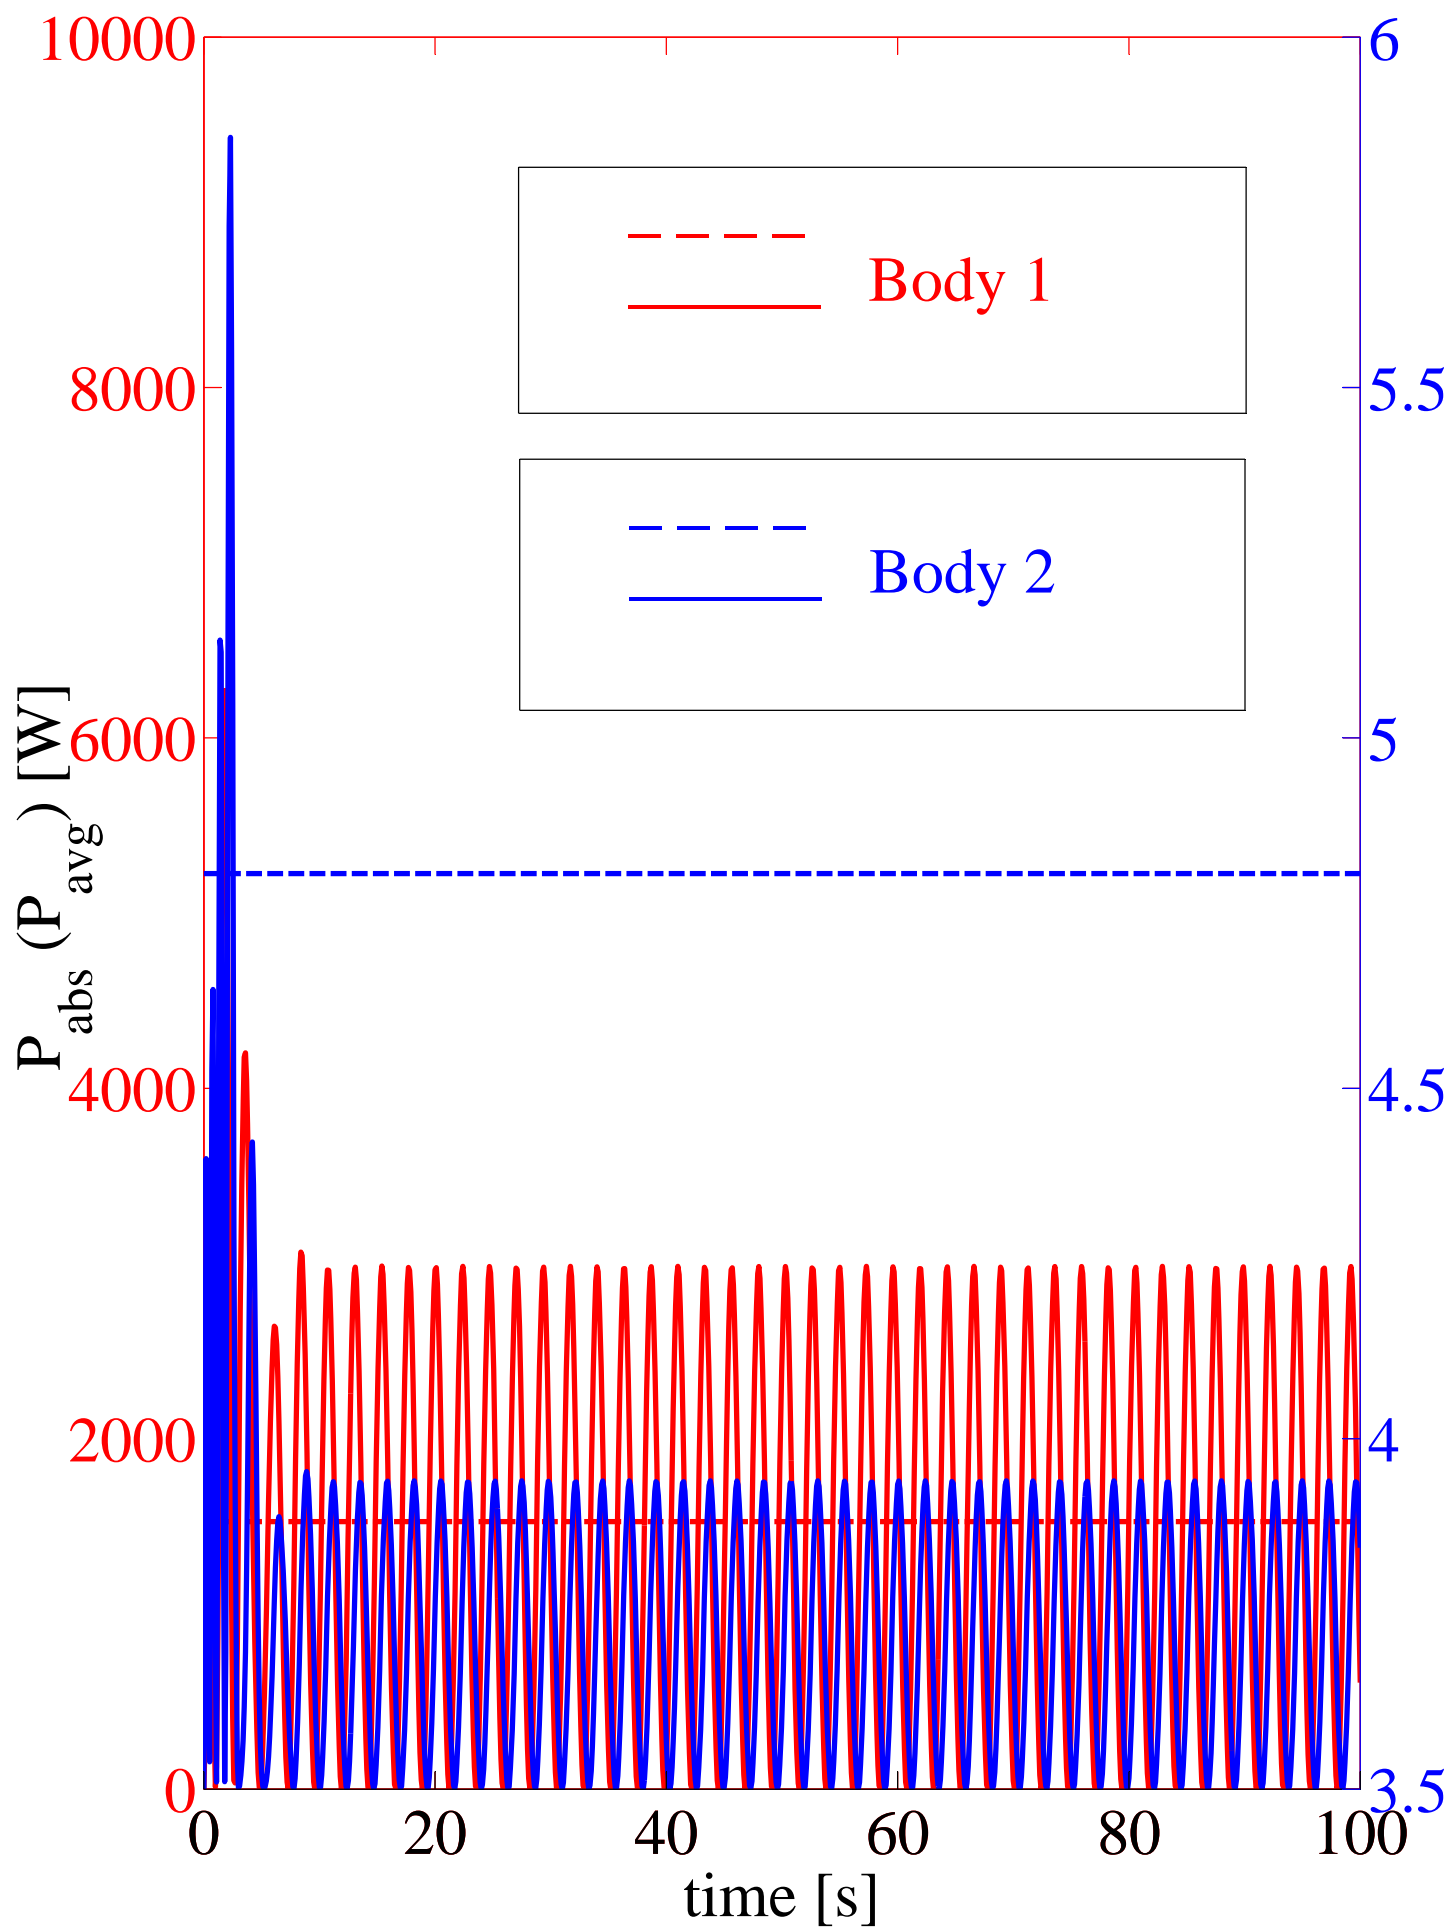

Supplement: Supplementary file 8 [file supplementary]

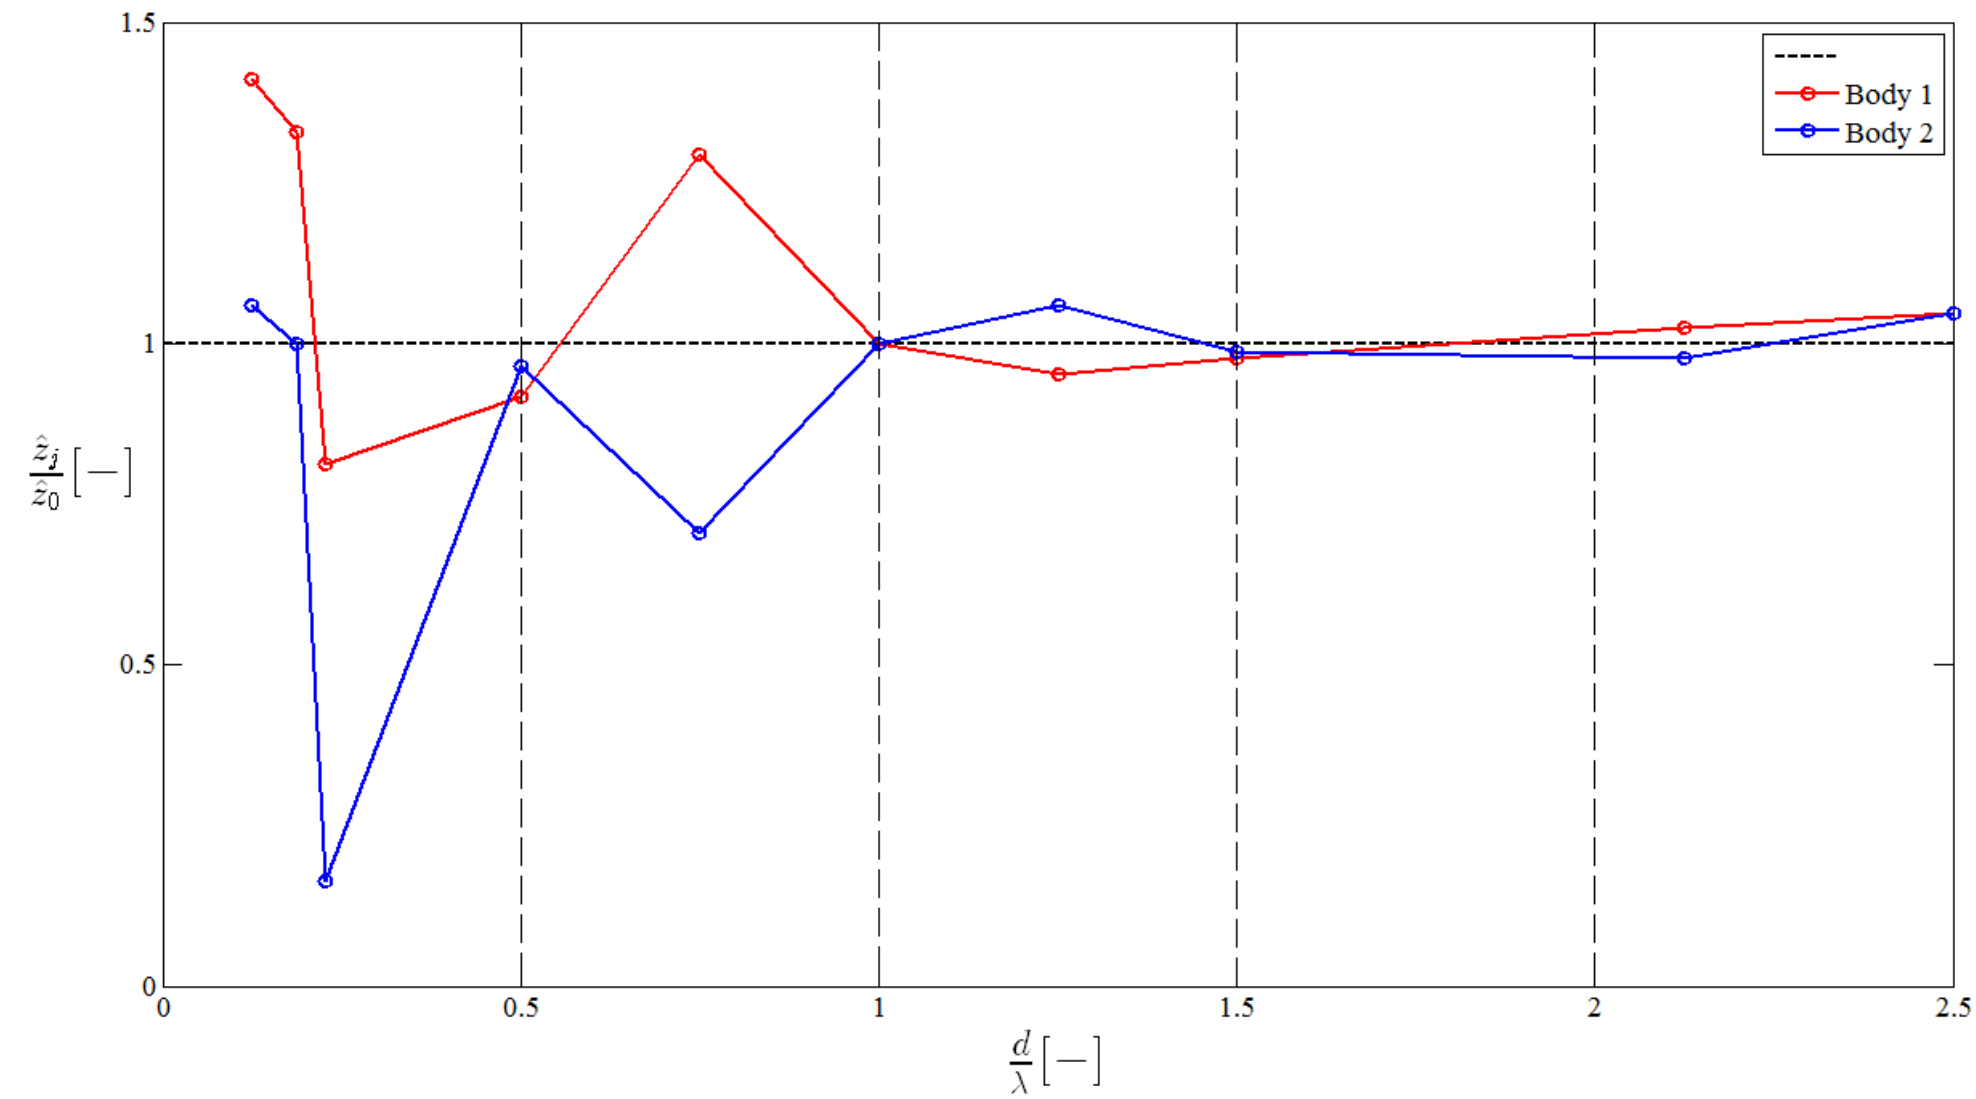

Supplement: Supplementary file 9 [file supplementary]

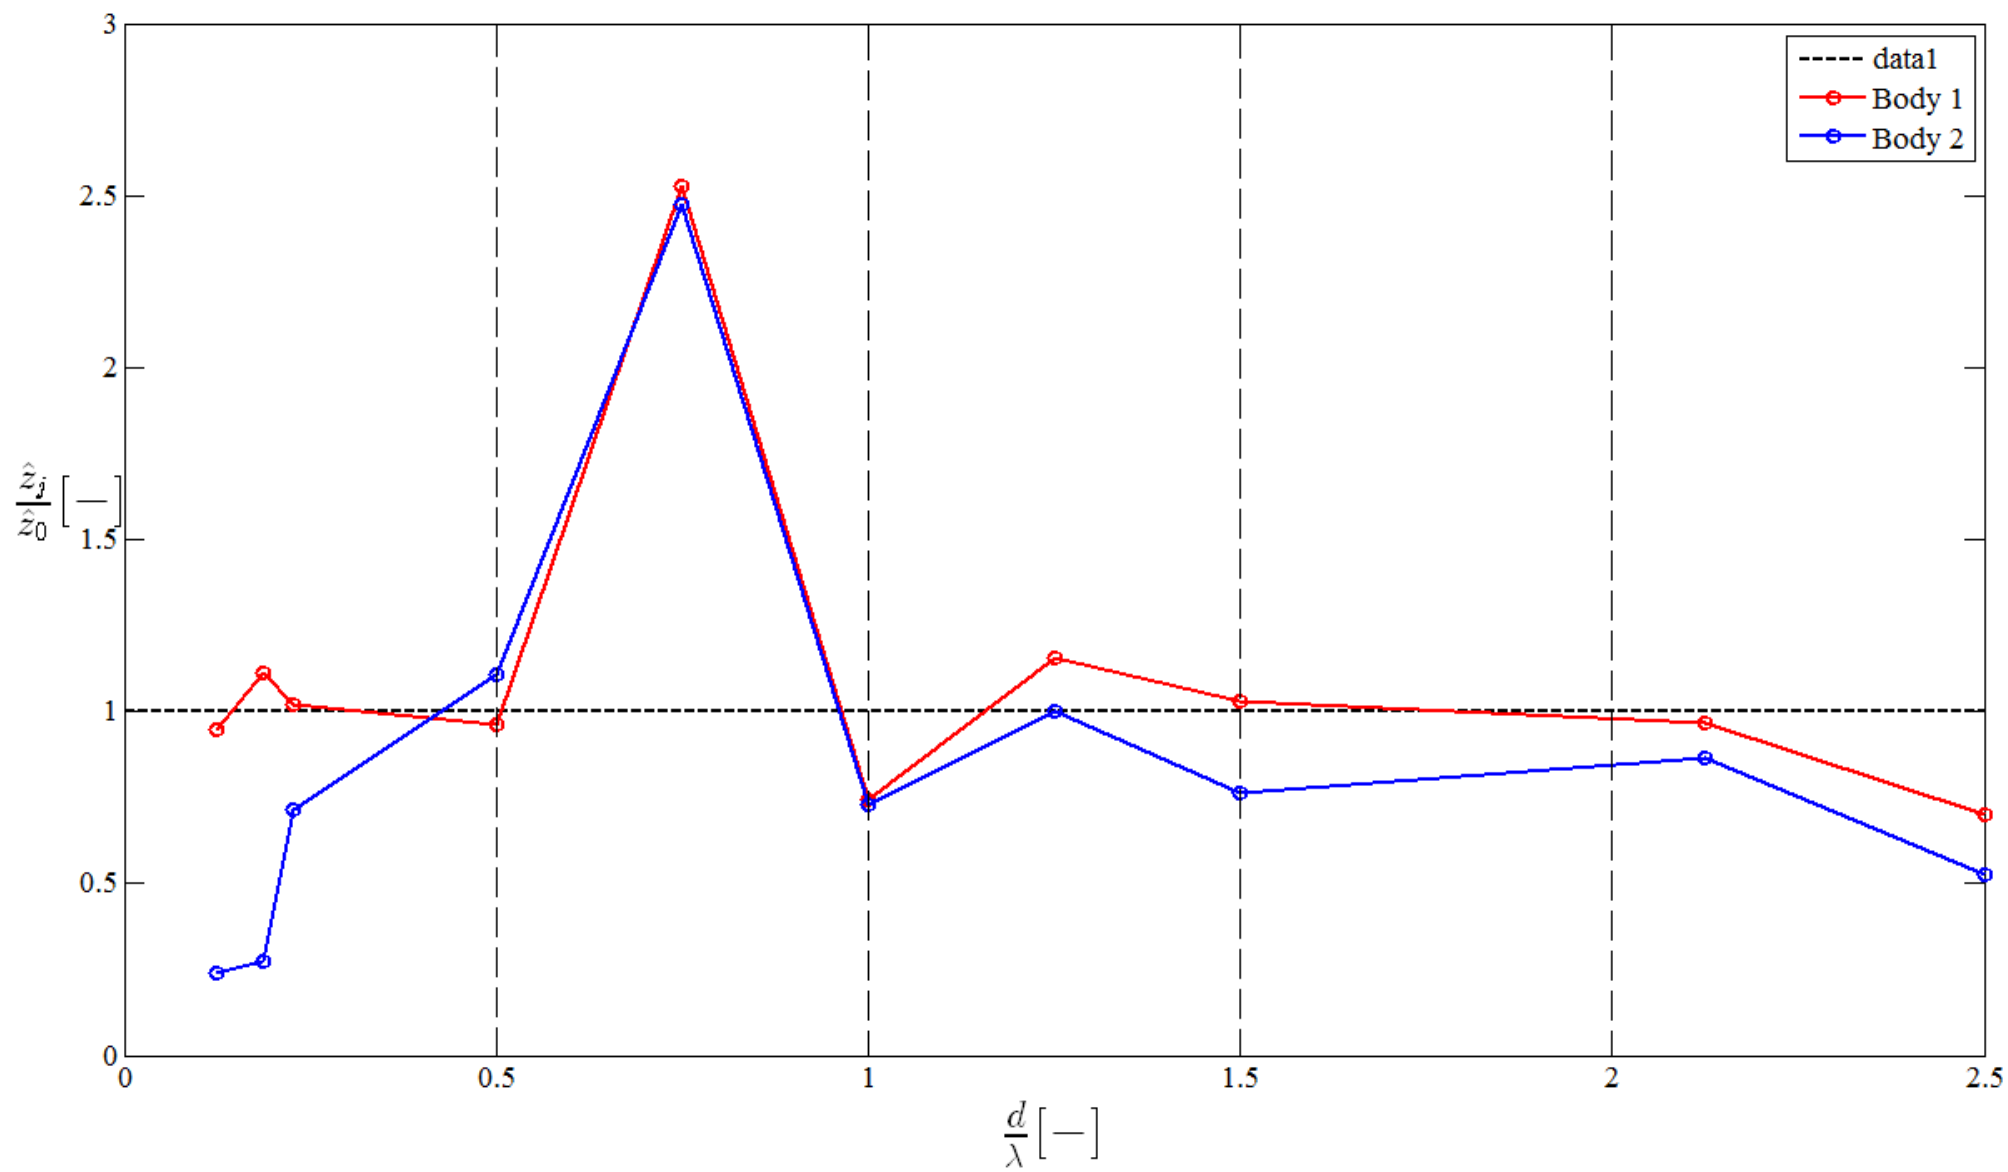

Supplement: Supplementary file 10 [file supplementary]

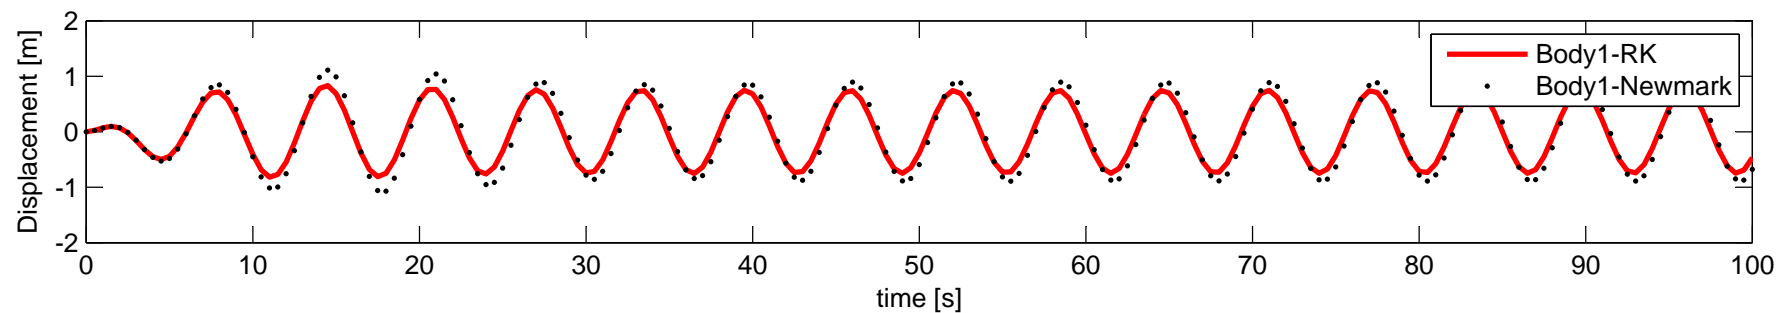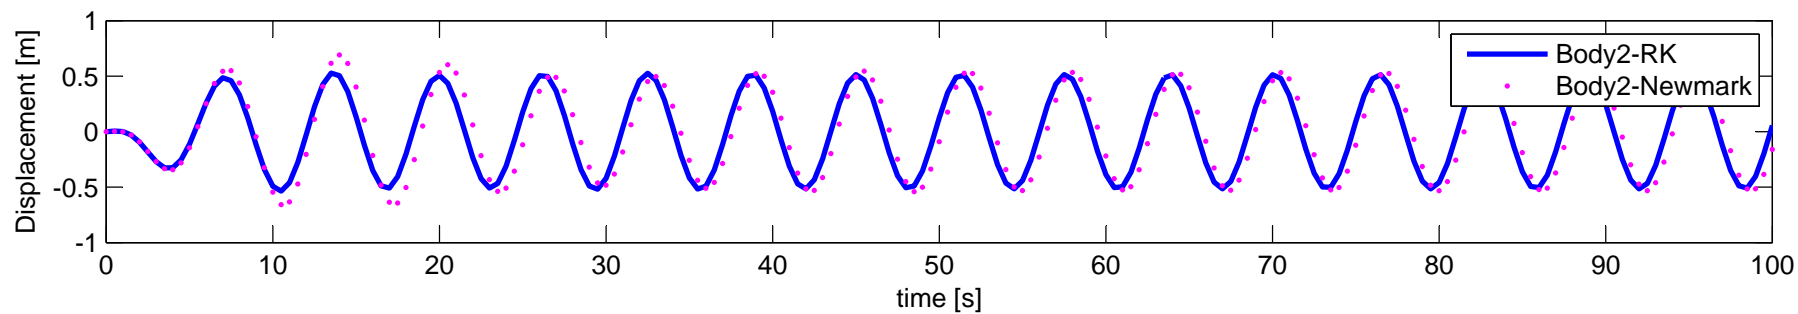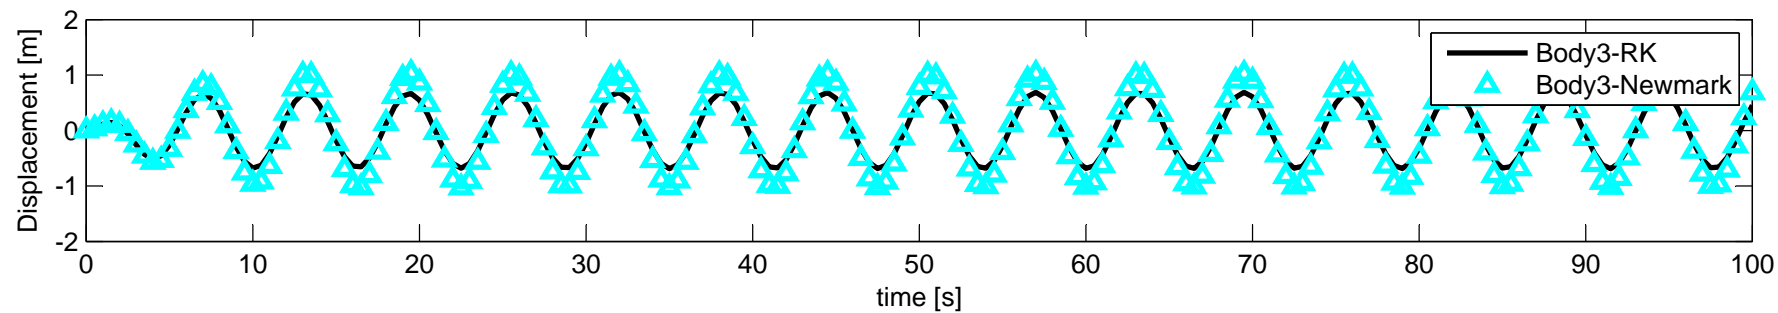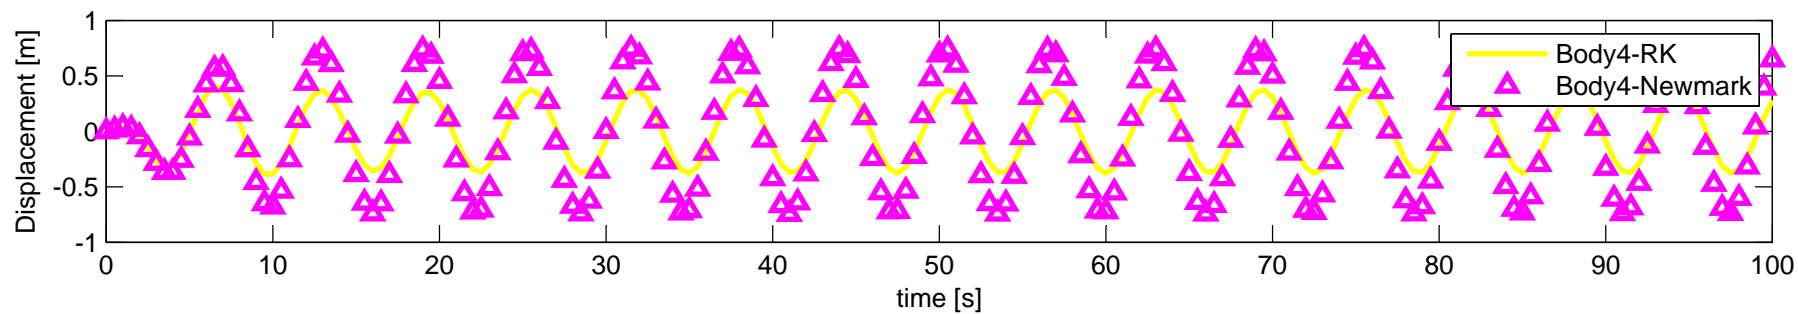

Supplement: Supplementary file 11 [file supplementary]

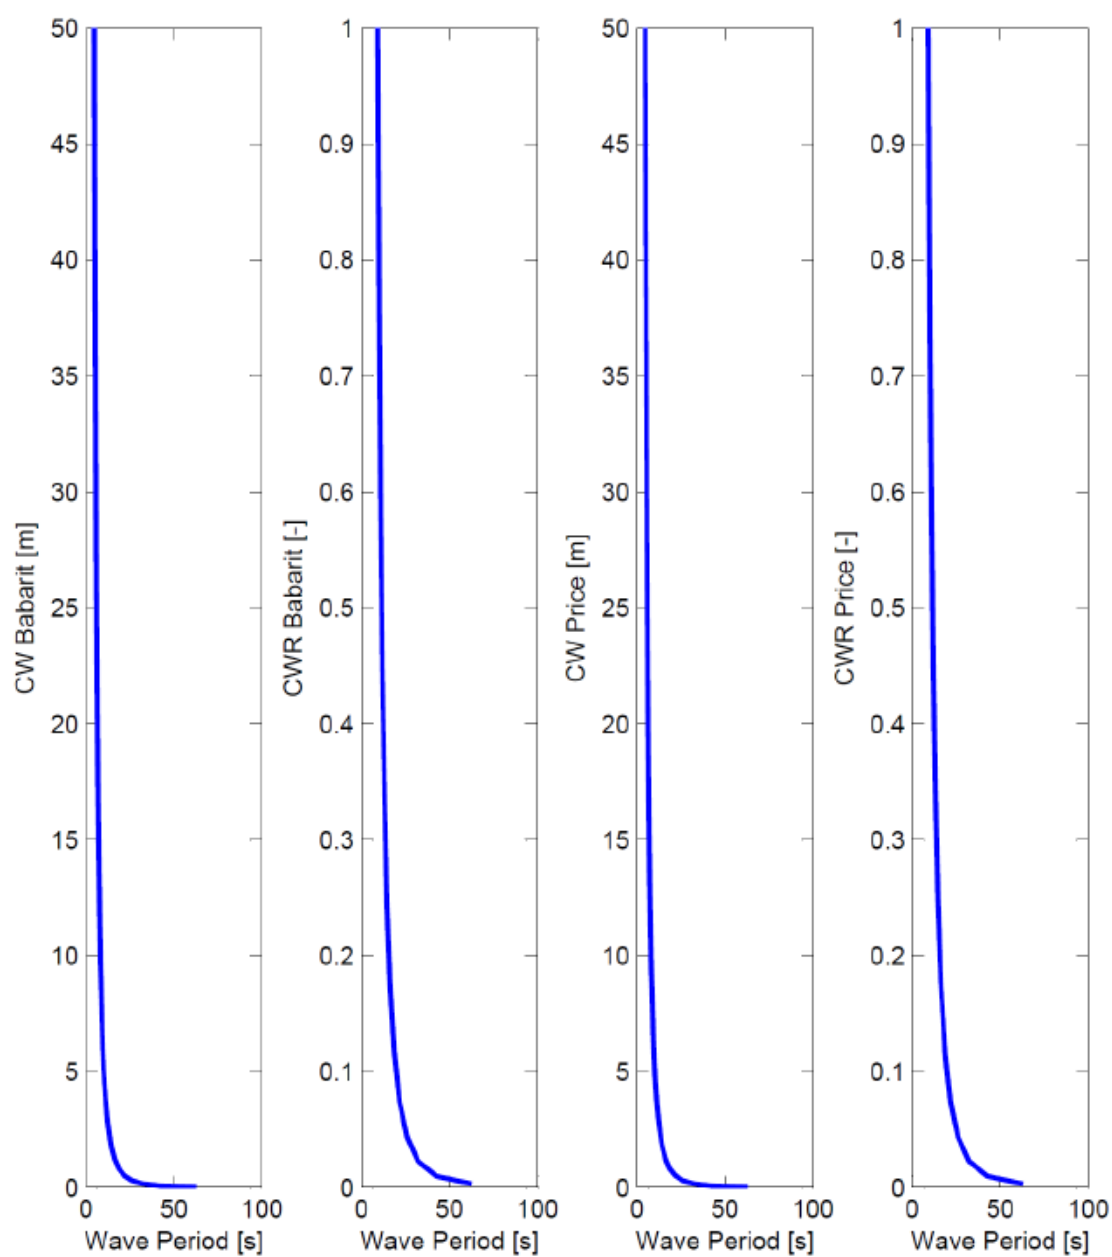

Supplement: Supplementary file 12 [file supplementary]

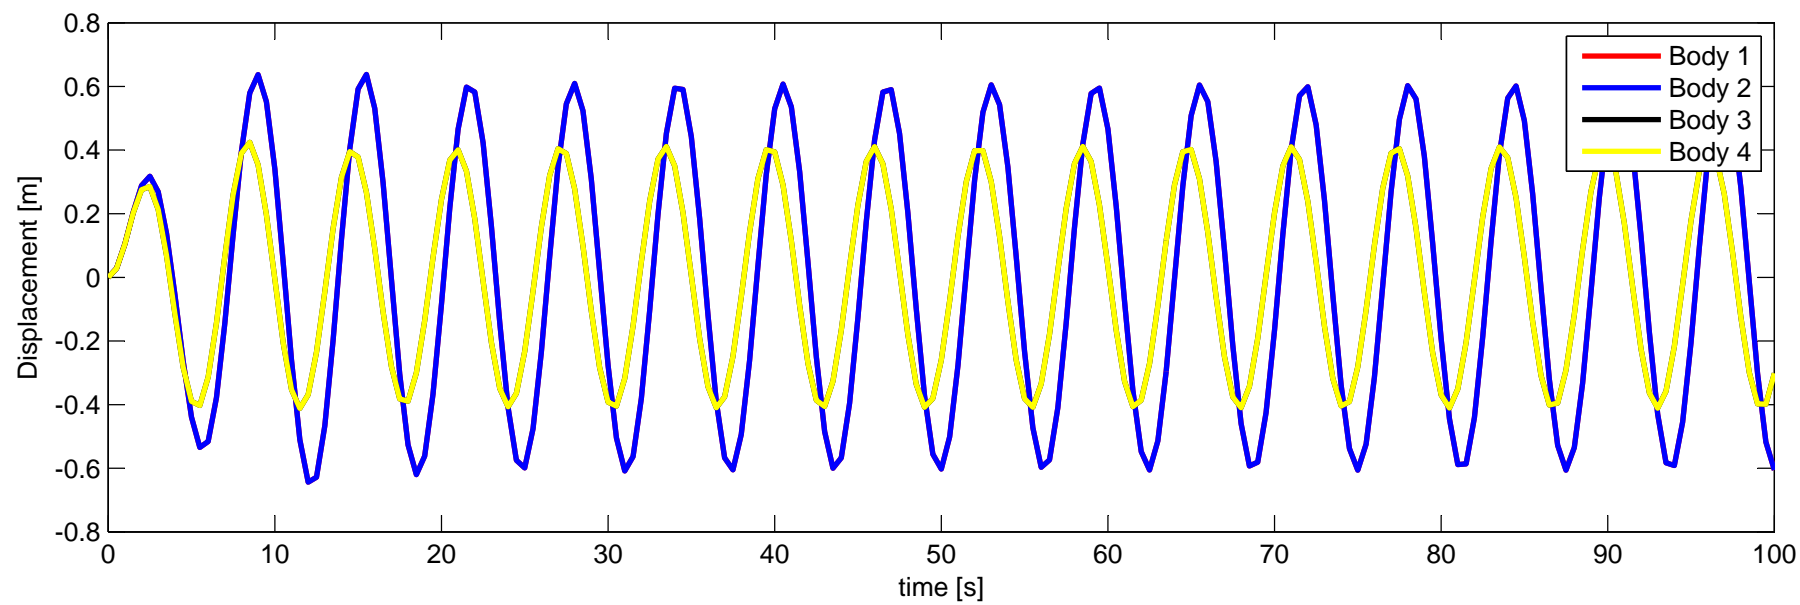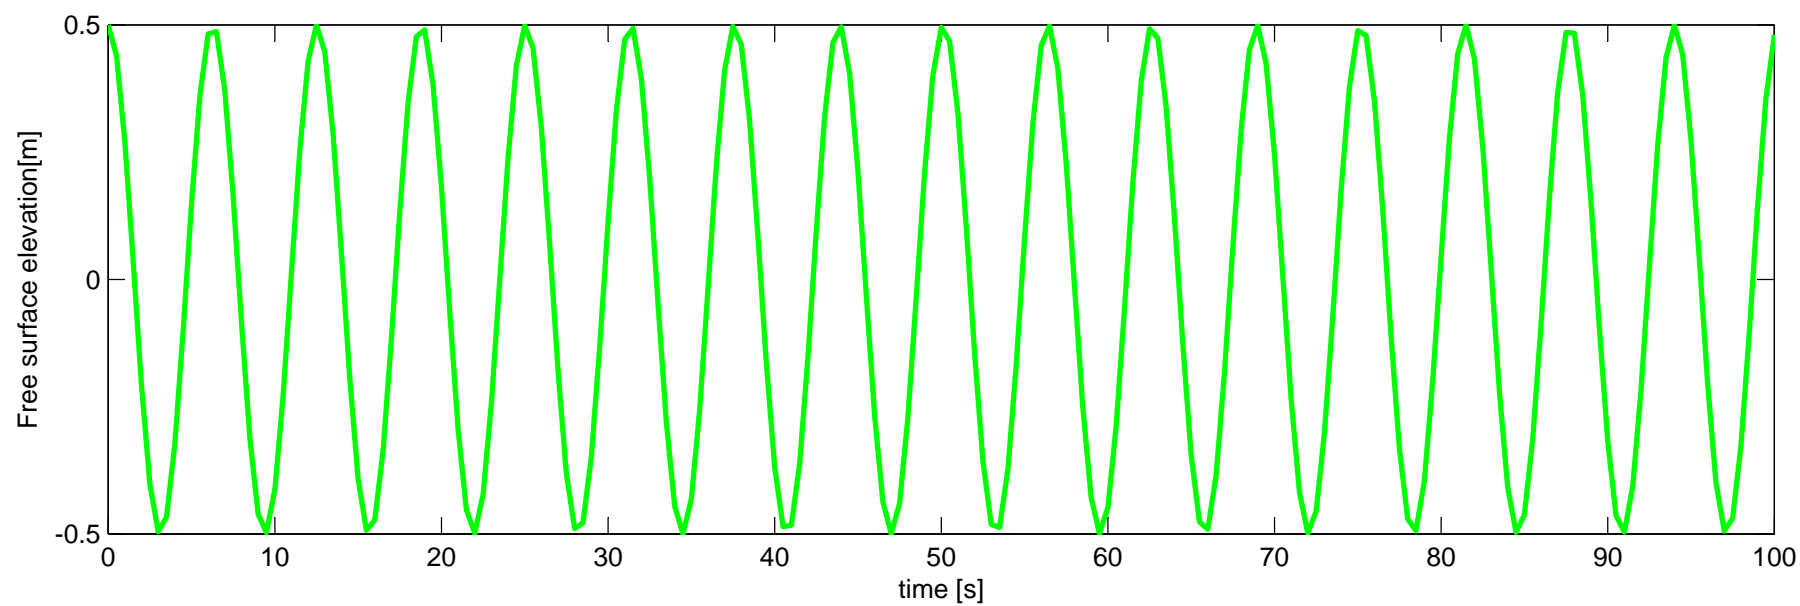

Supplement: Supplementary file 13 [file supplementary]

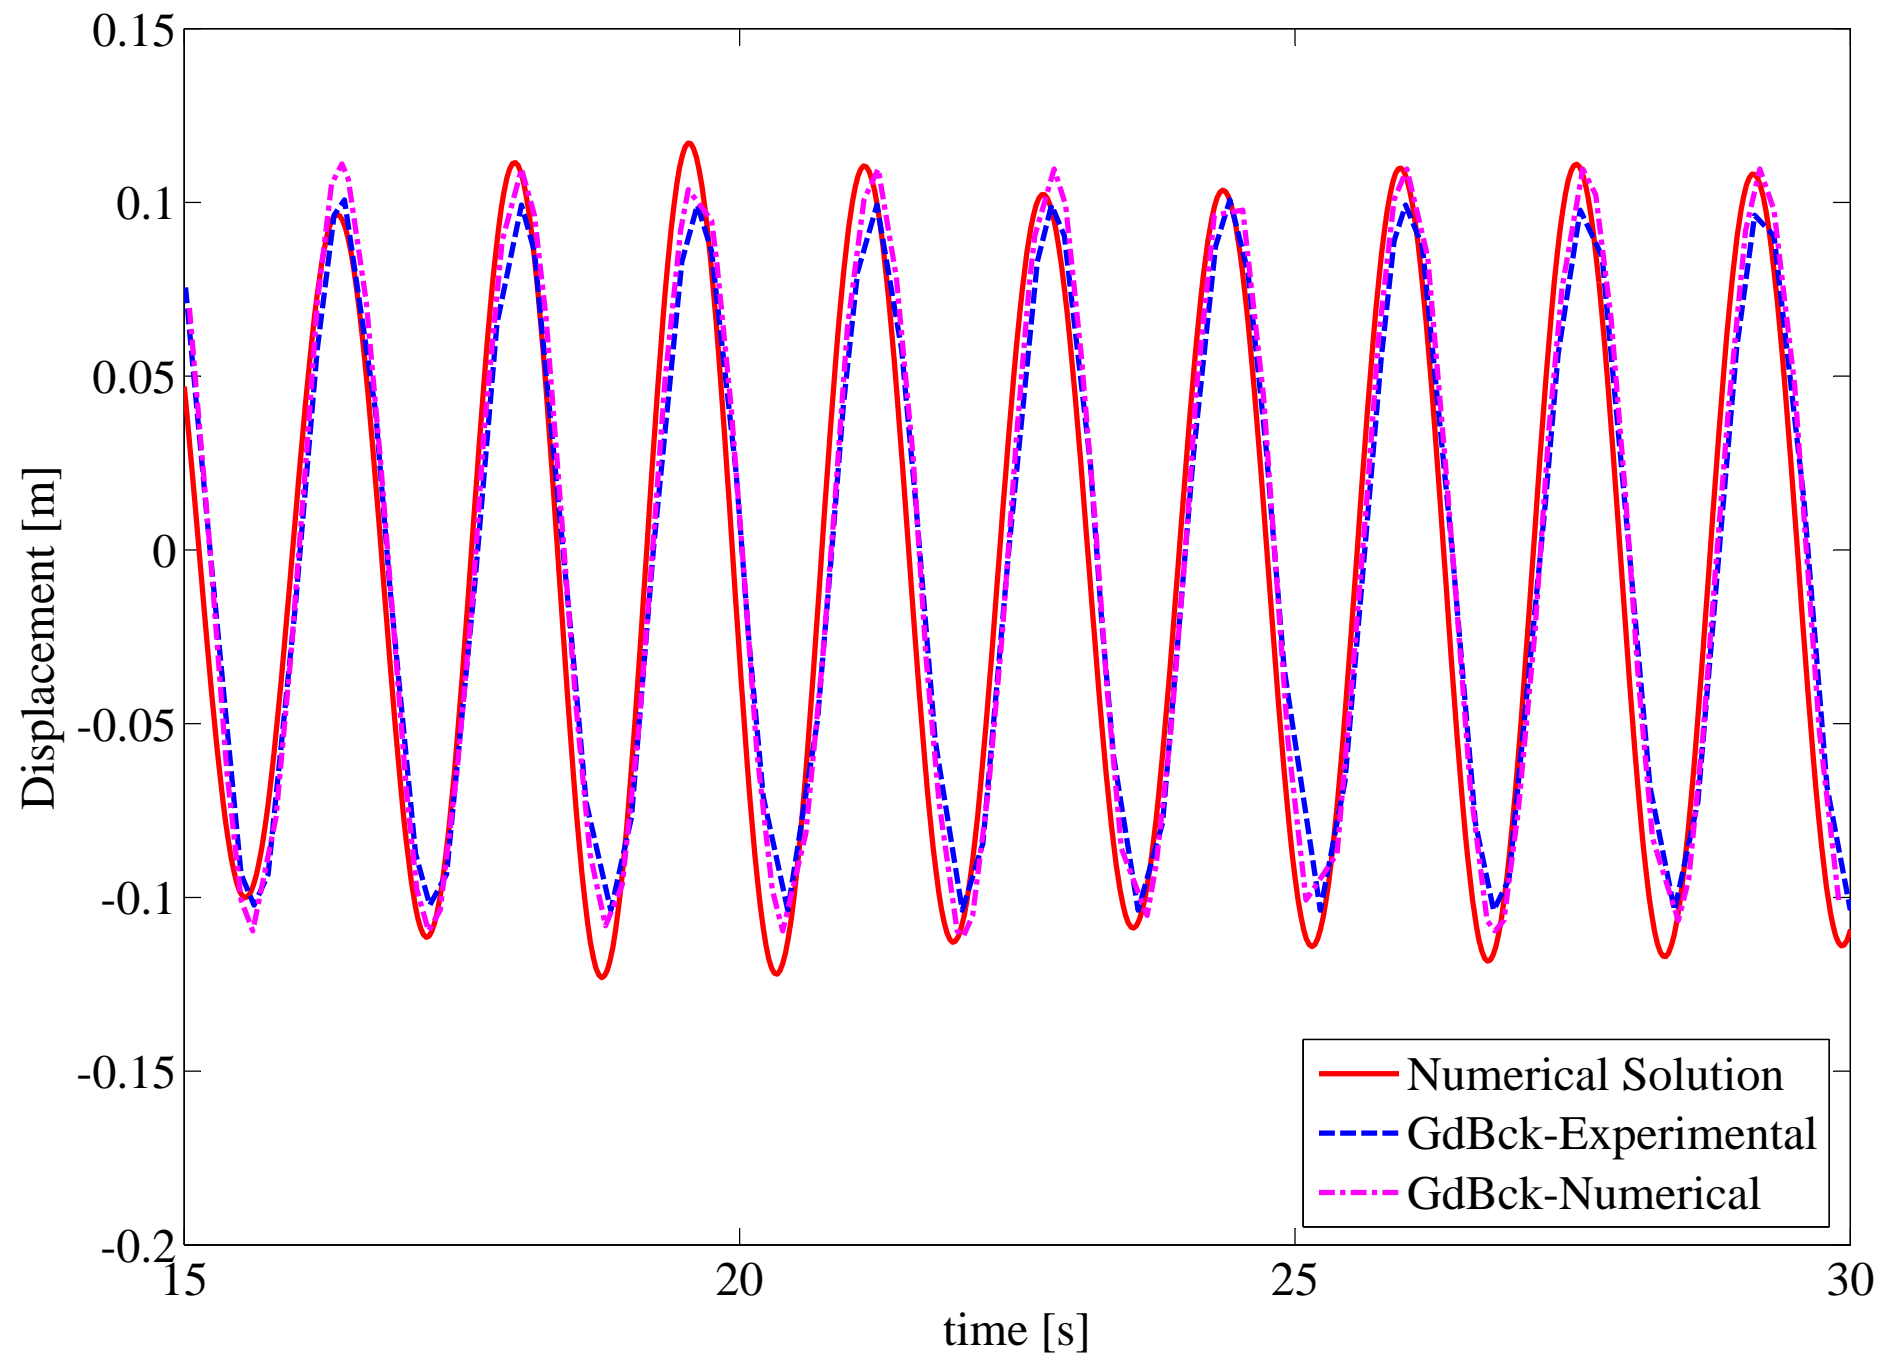

Supplement: Supplementary file 14 [file supplementary]

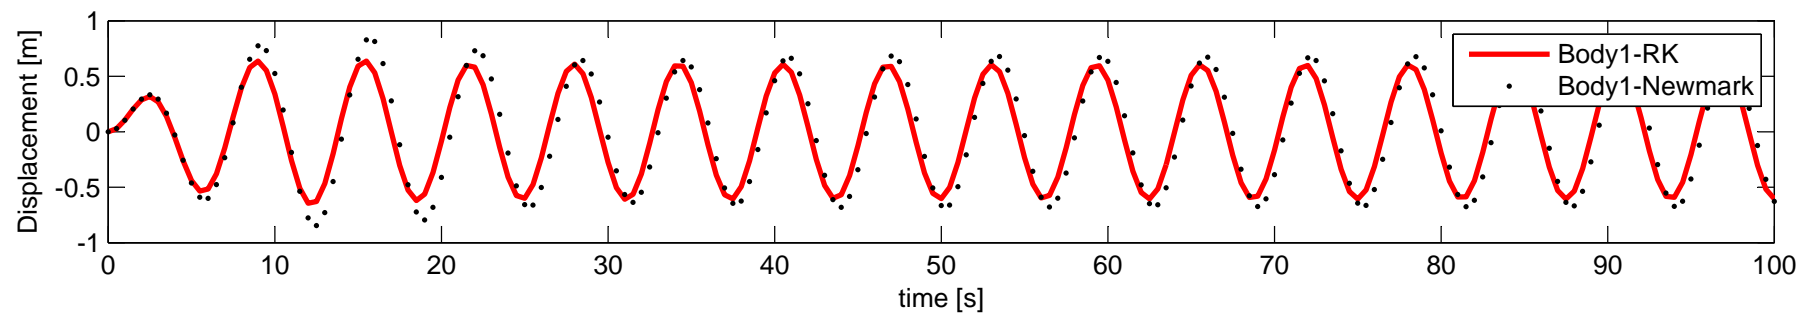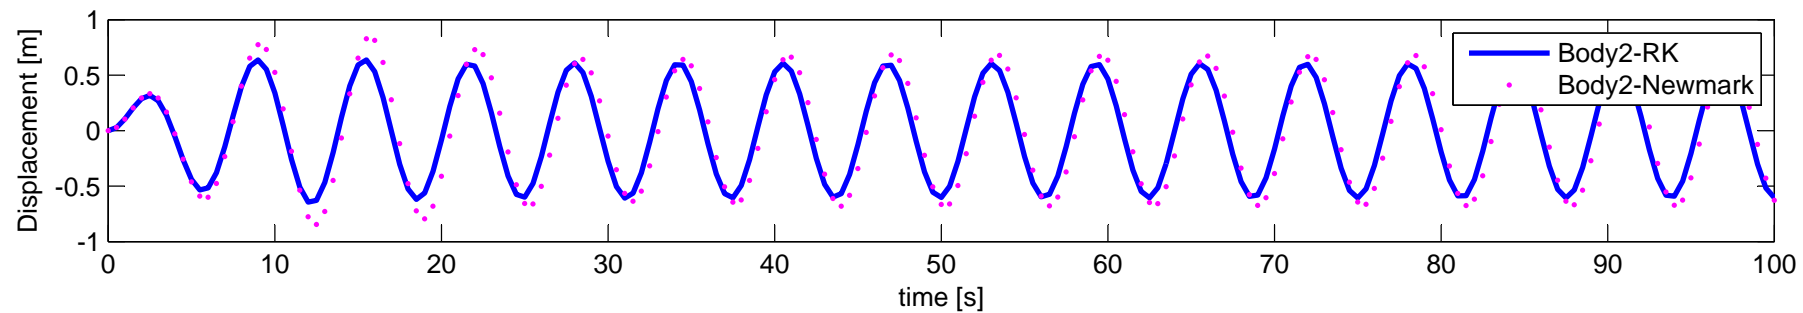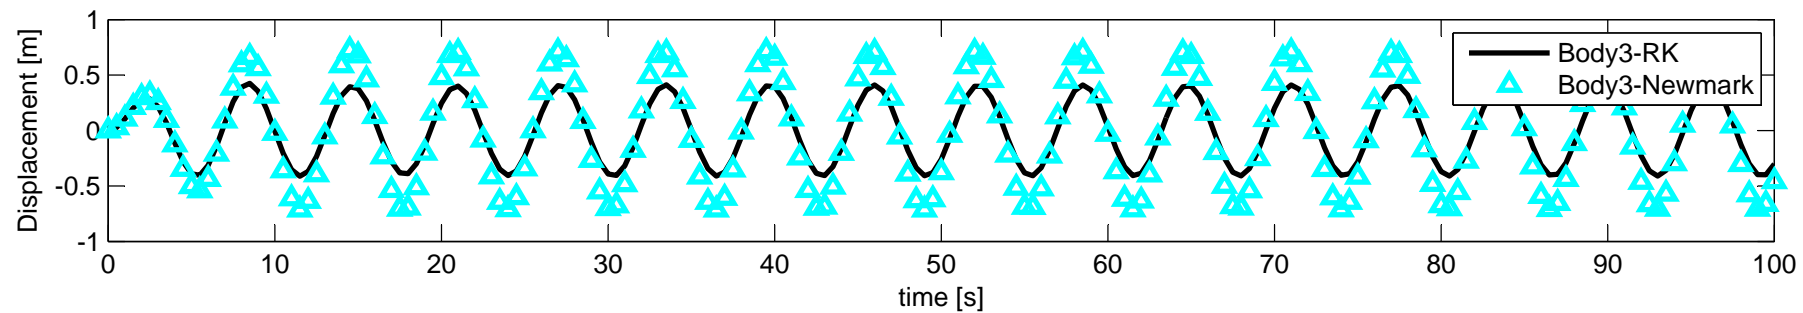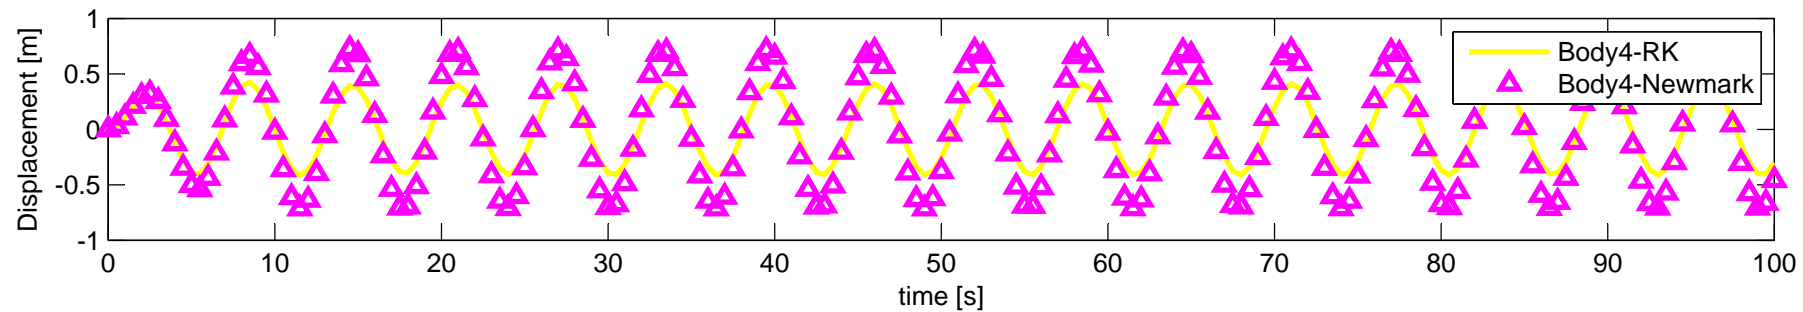

Supplement: Supplementary file 15 [file supplementary]

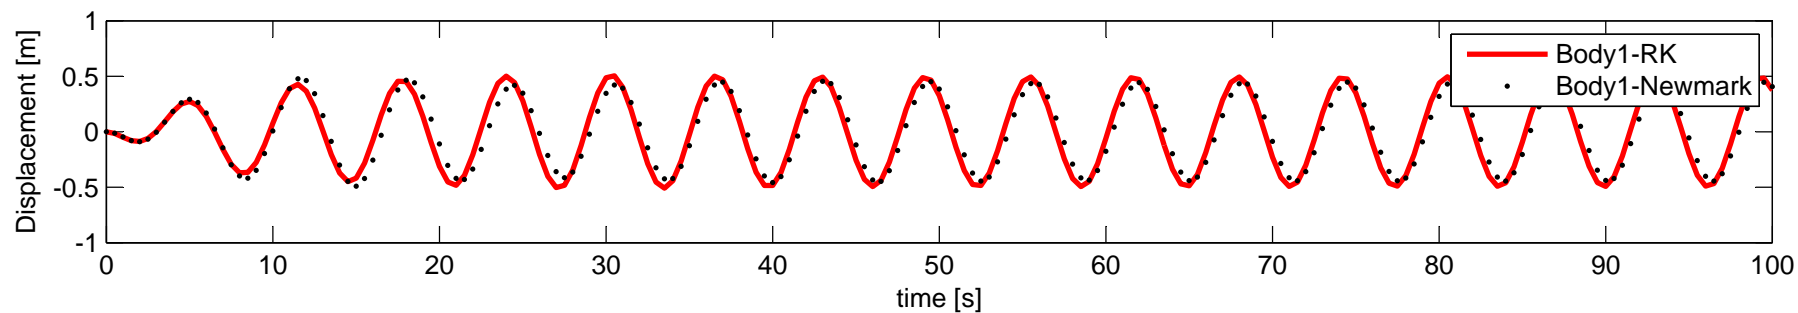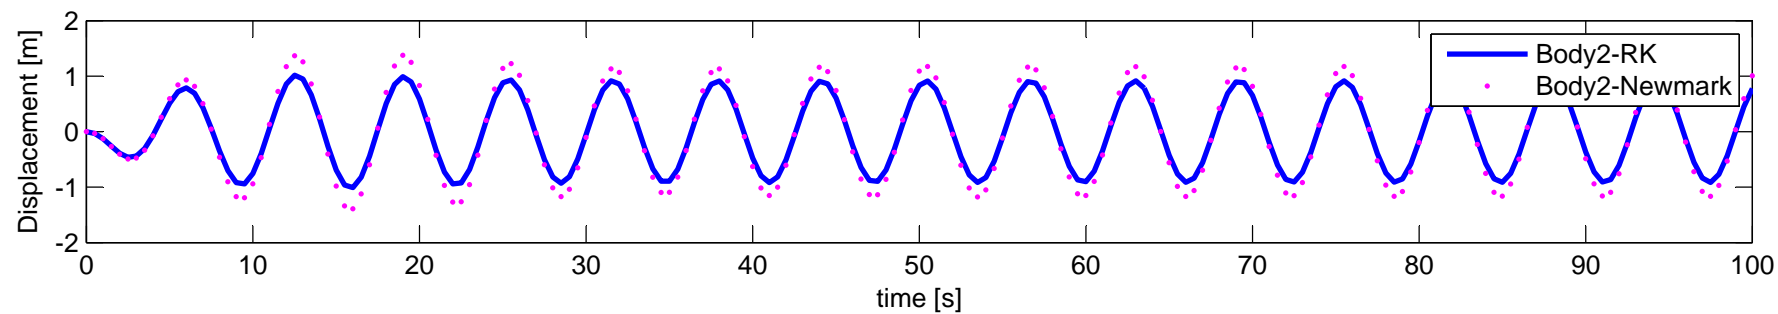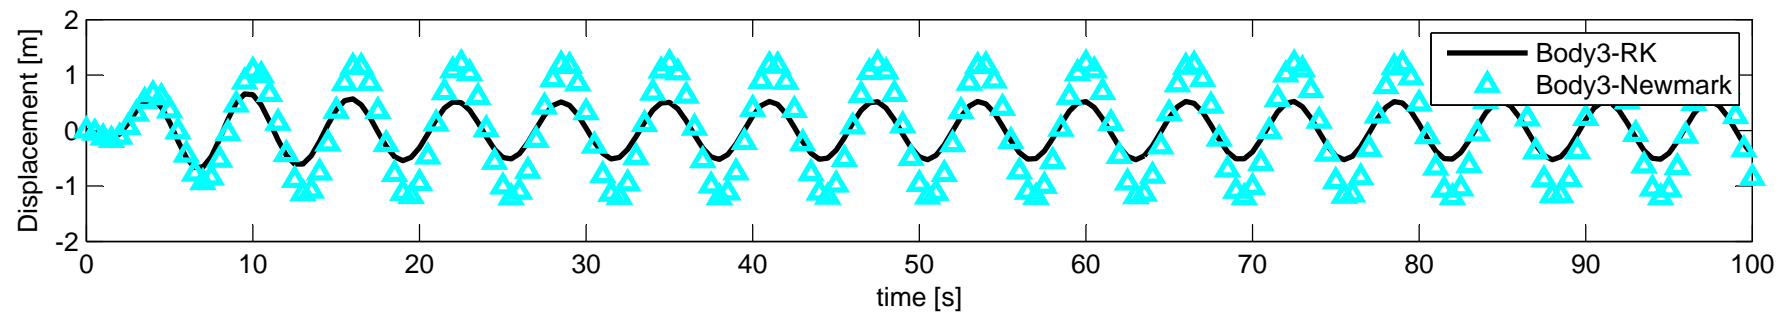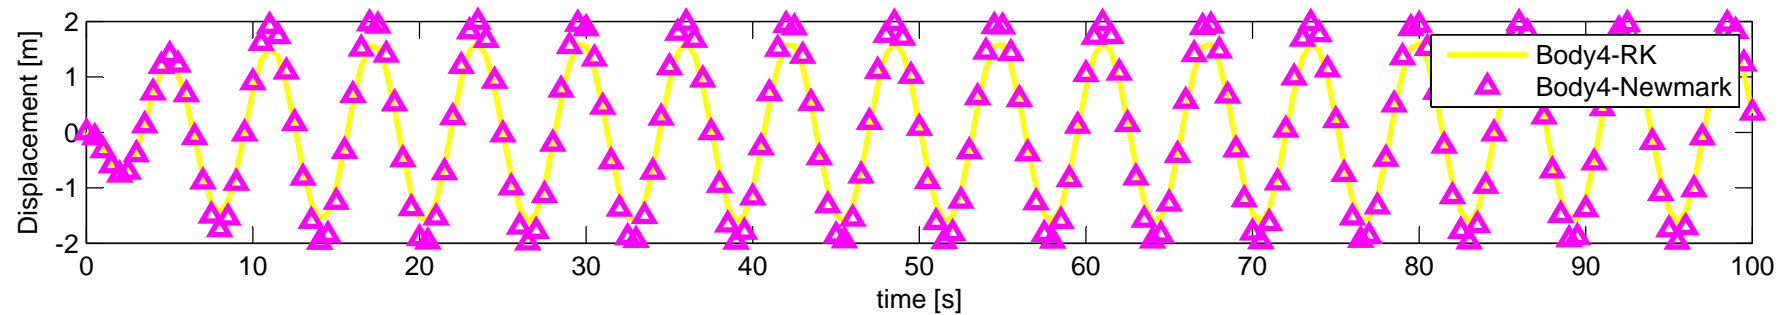

Supplement: Supplementary file 16 [file supplementary]

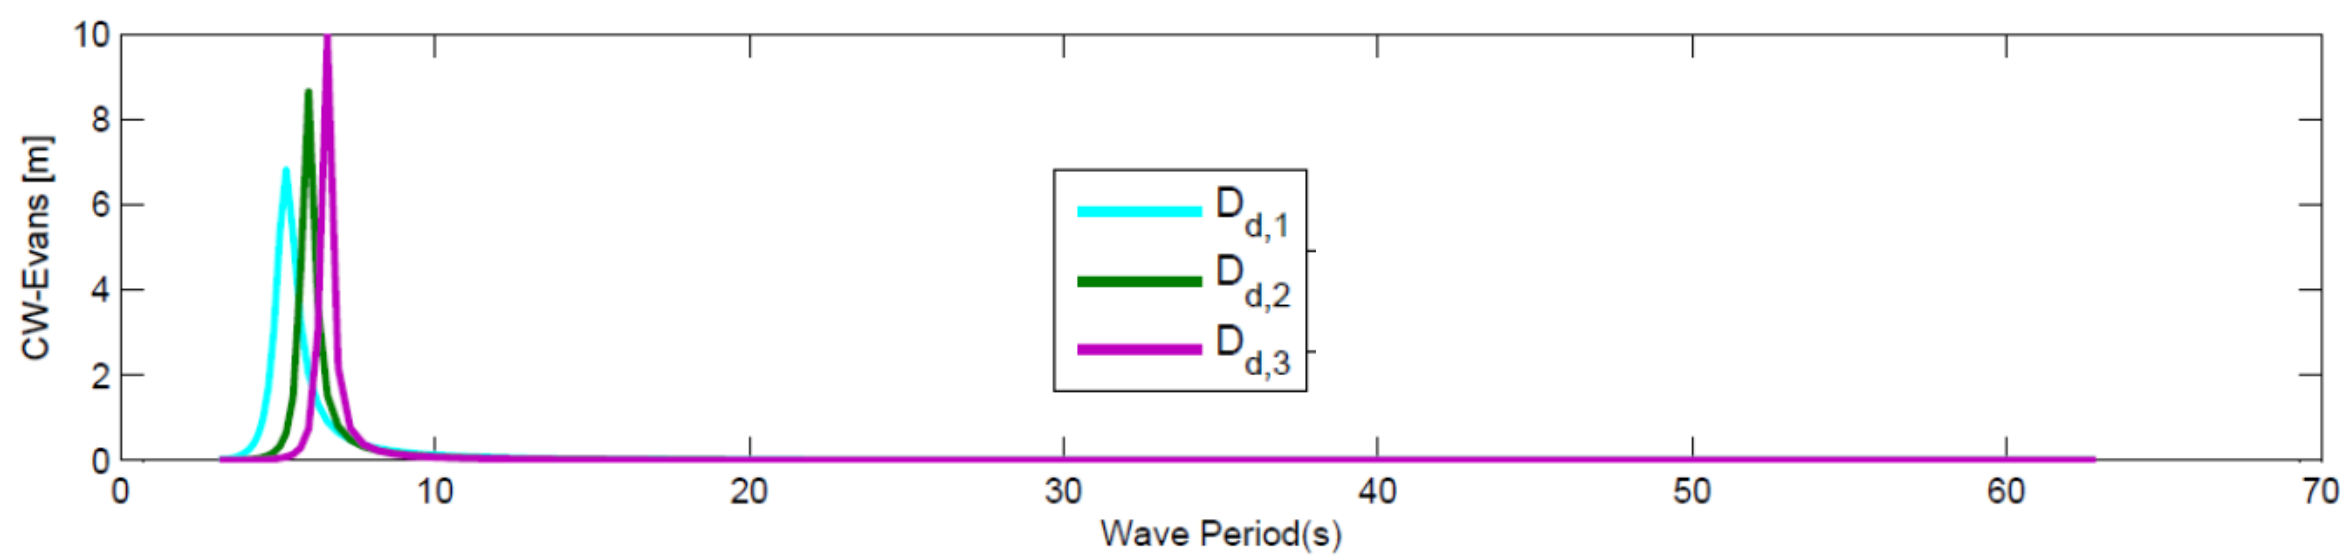

Supplement: Supplementary file 17 [file supplementary]

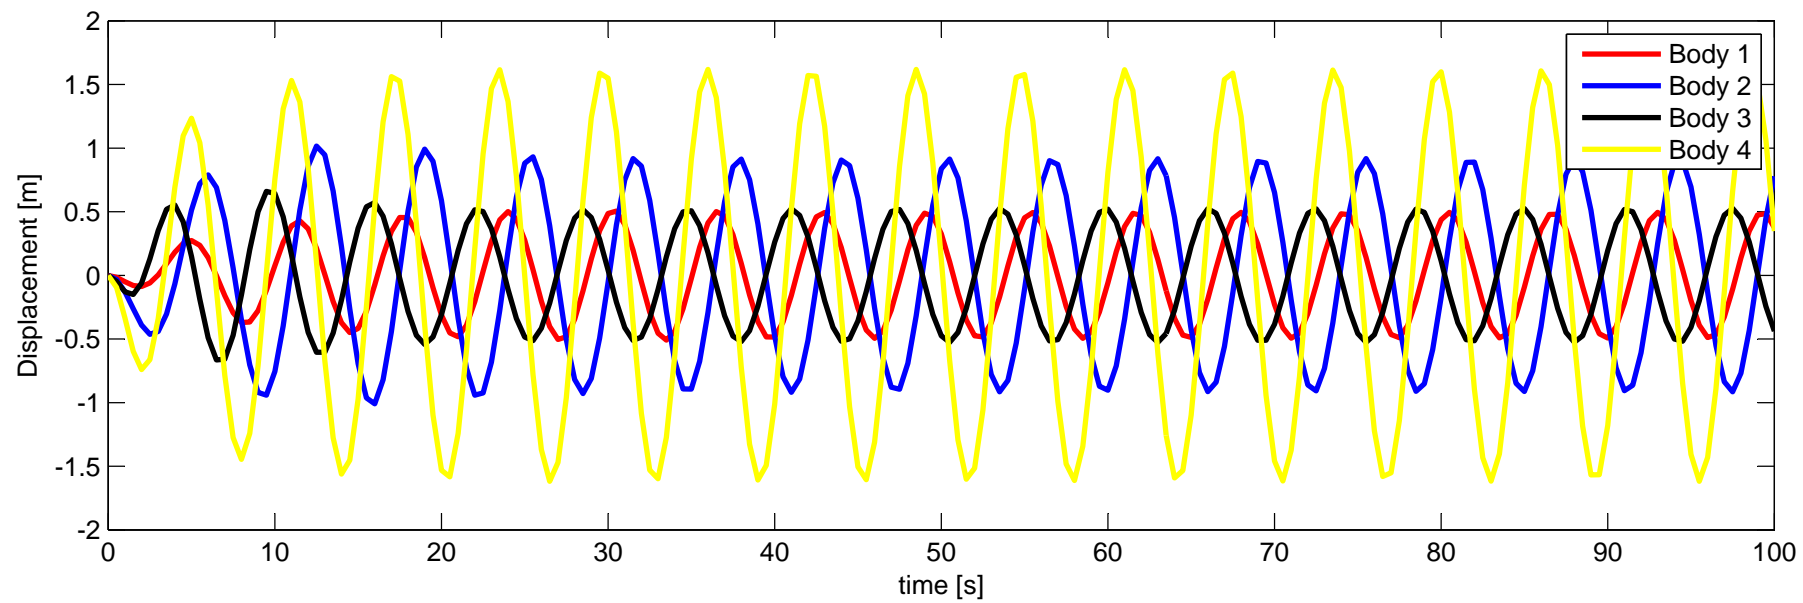

Supplement: Supplementary file 18 [file supplementary]

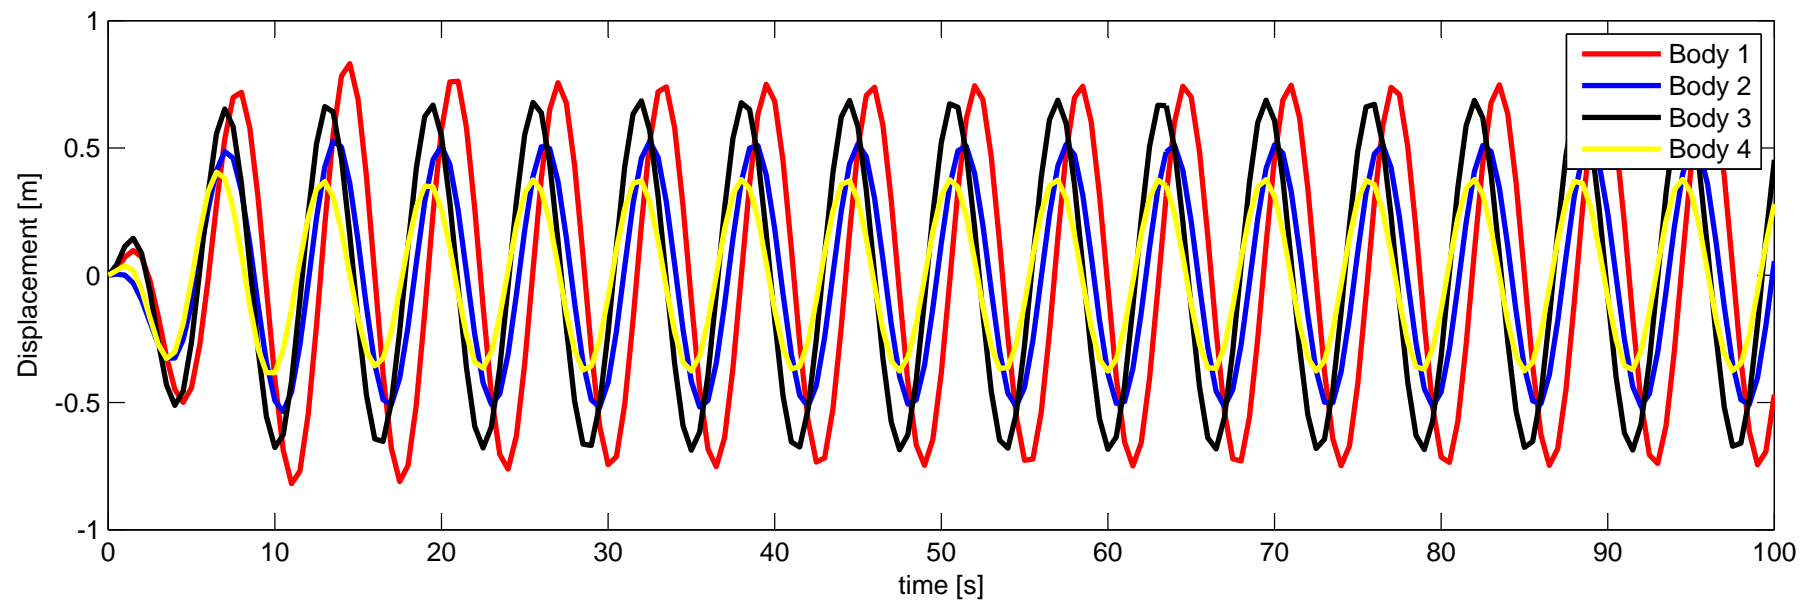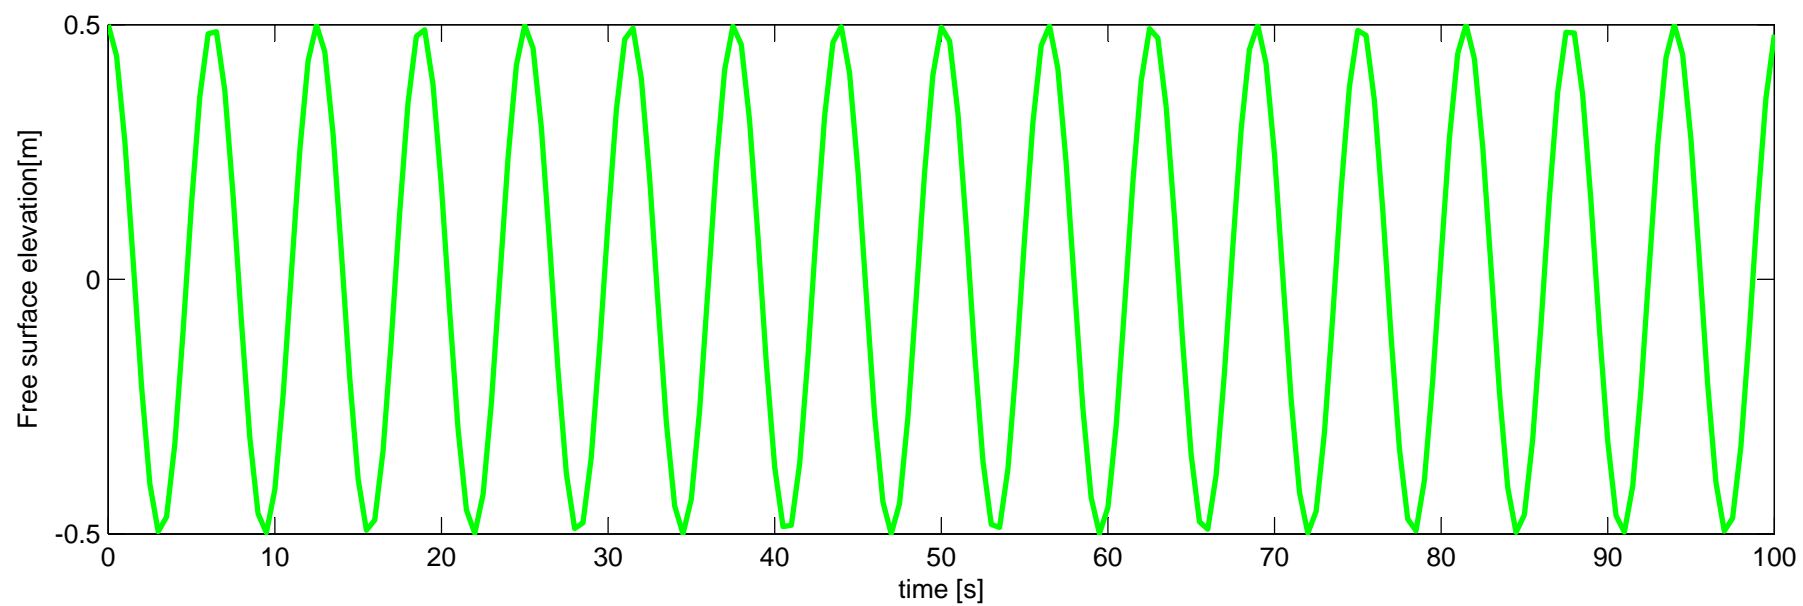

Supplement: Supplementary file 19 [file supplementary]

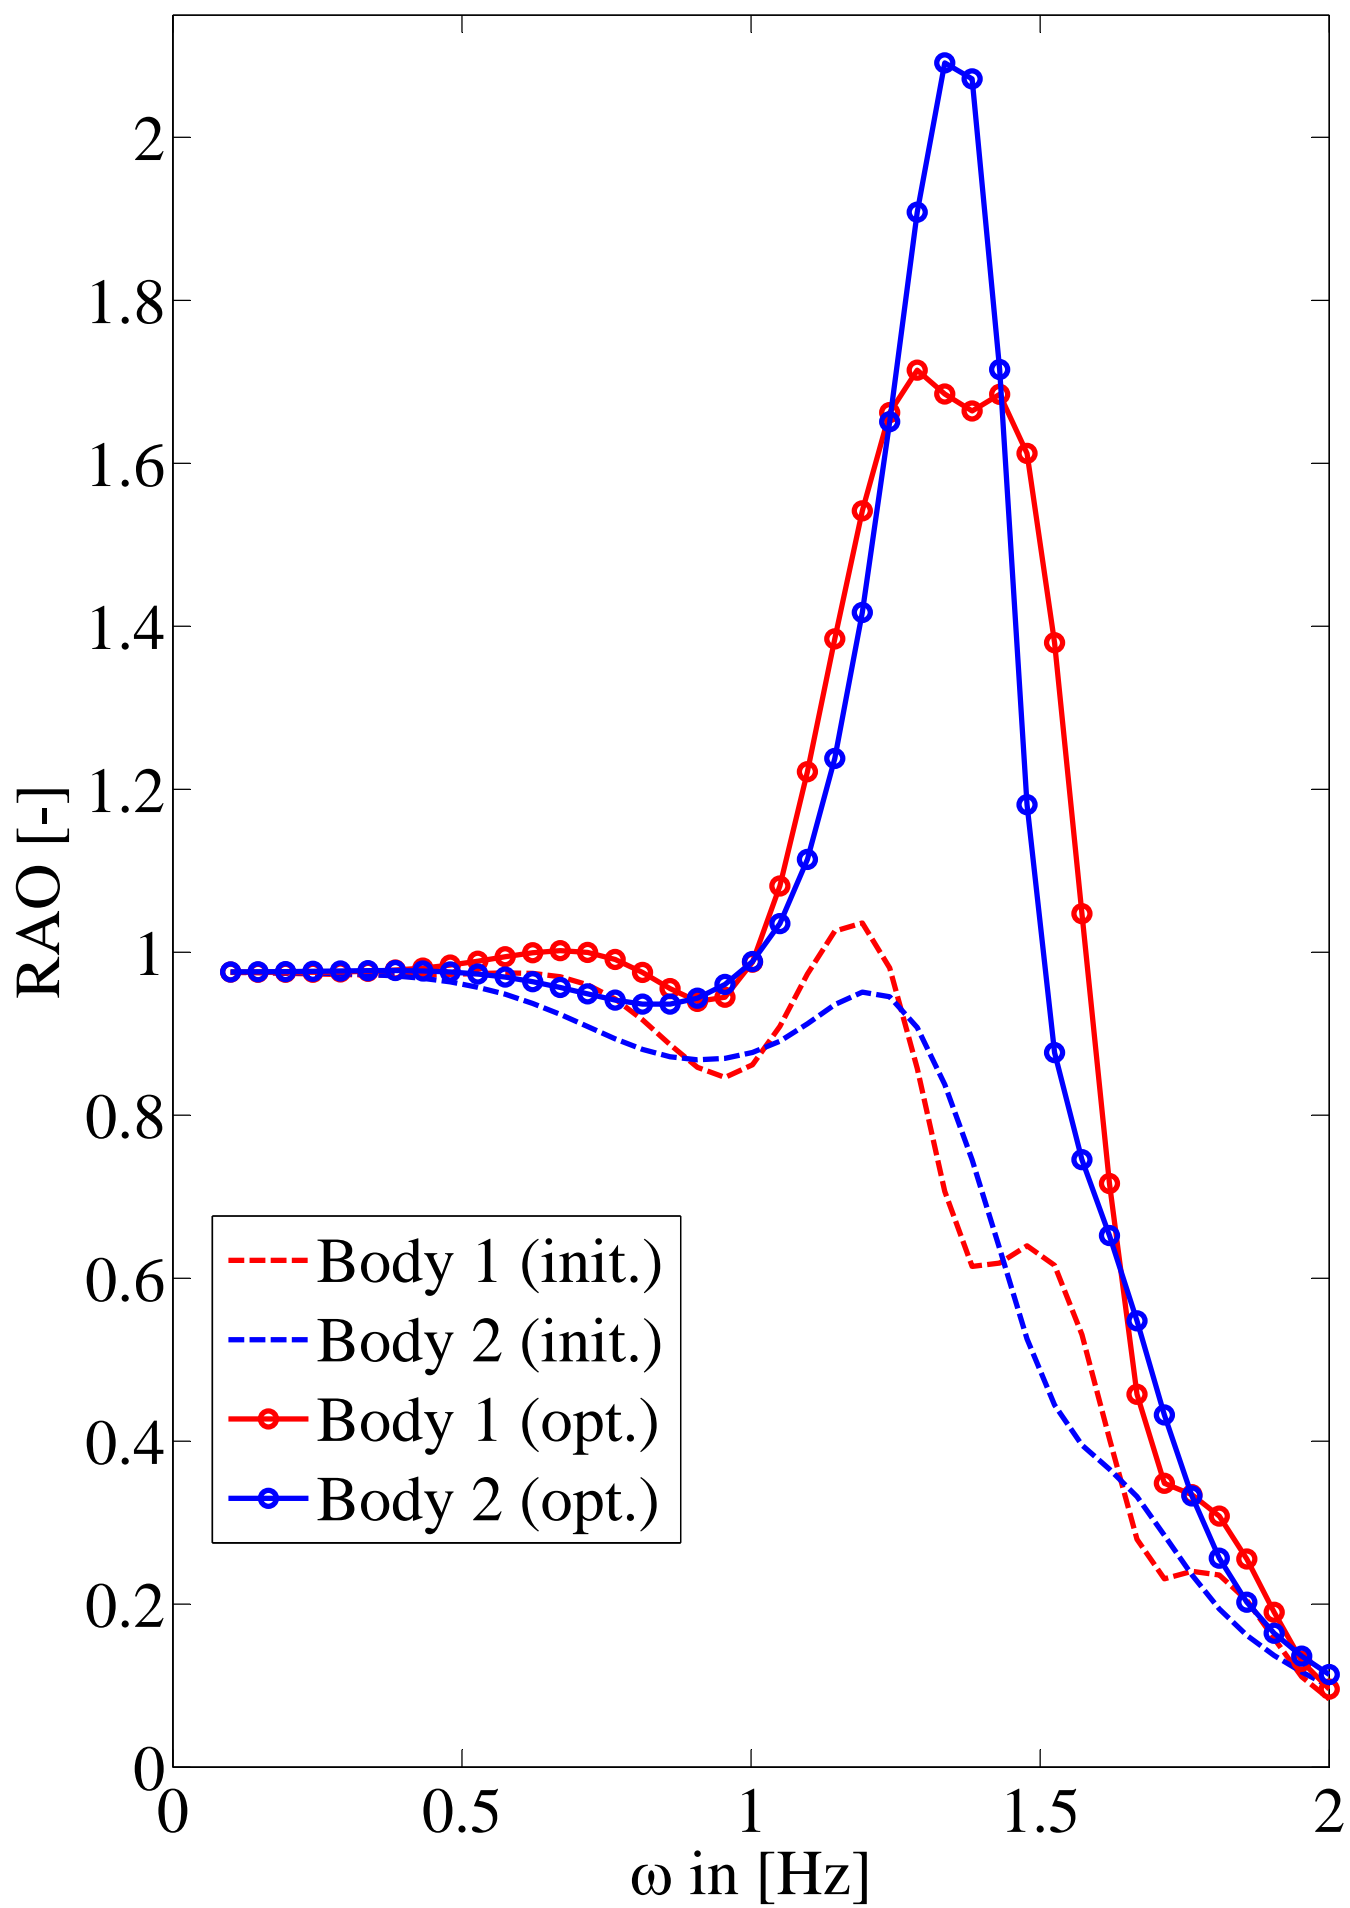

Supplement: Supplementary file 20 [file supplementary]

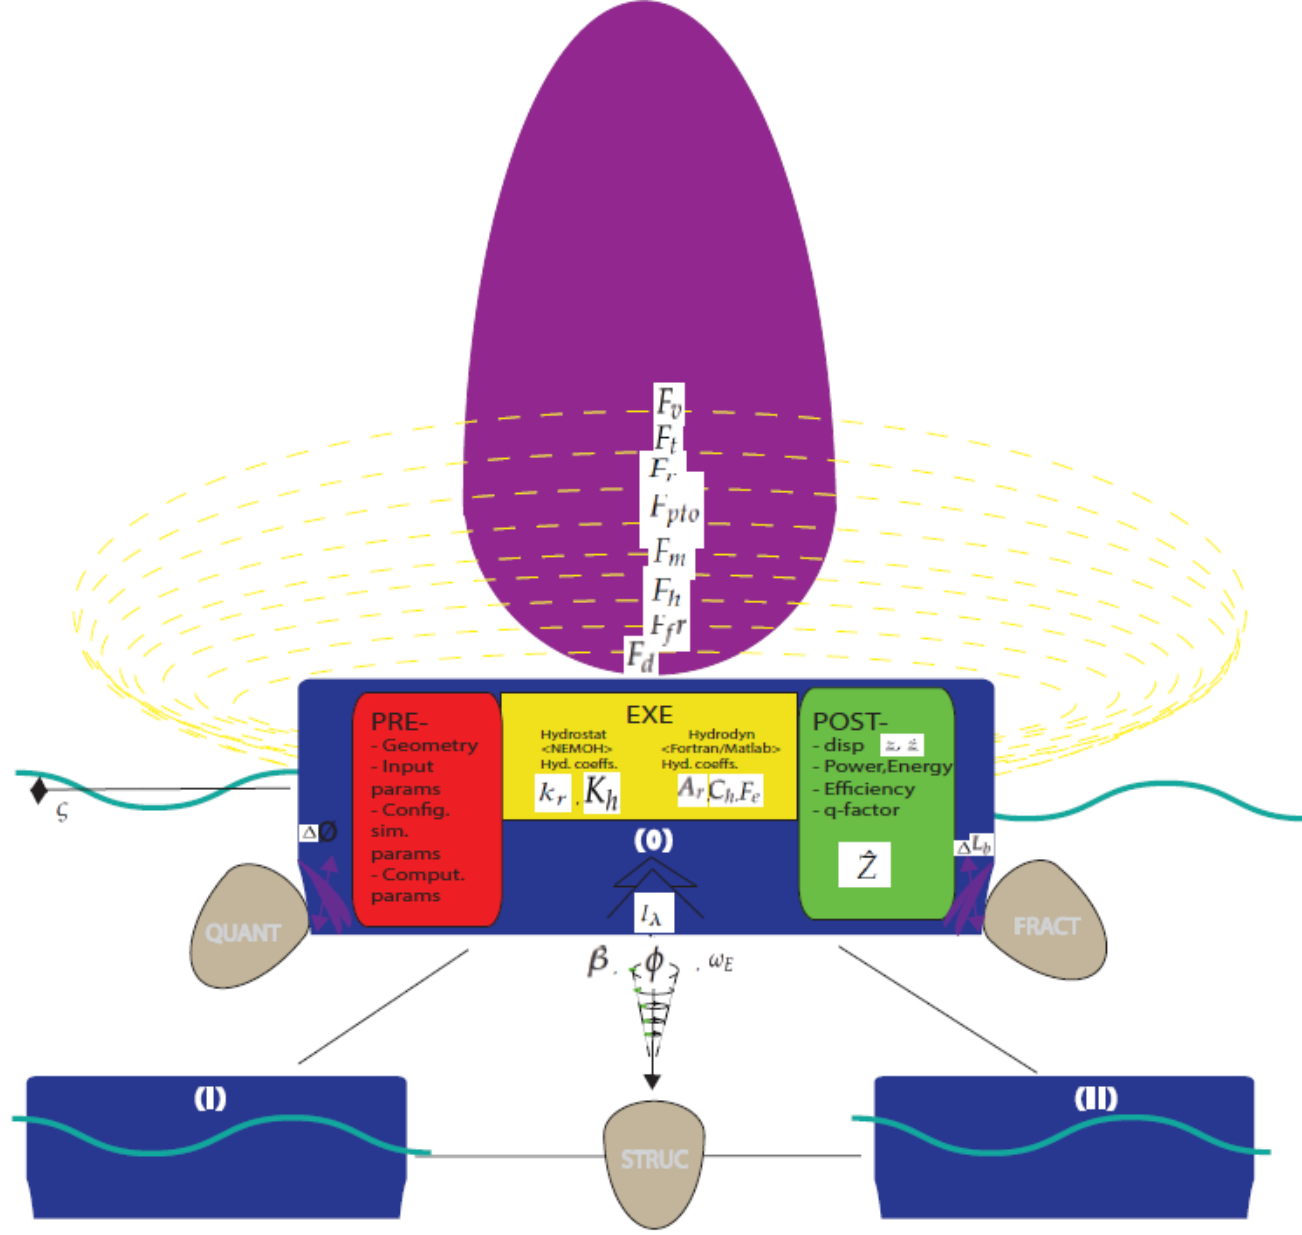

Supplement: Supplementary file 21 [file supplementary]

**(a)**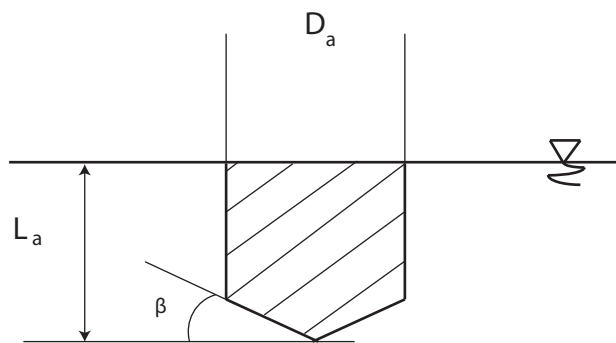**(b)**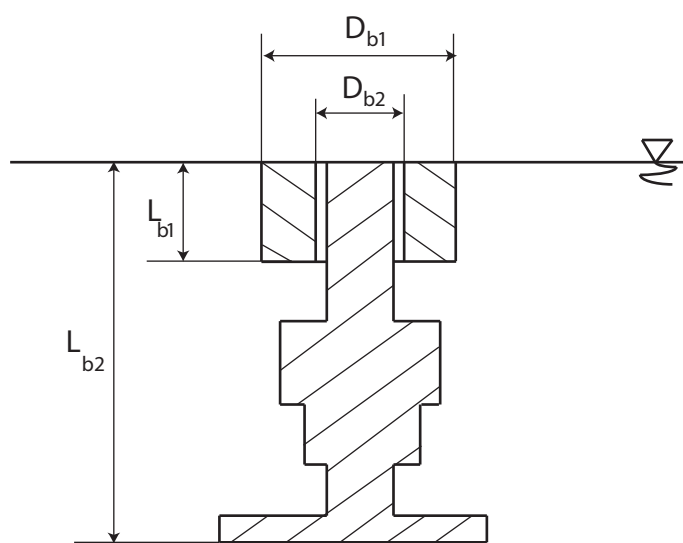**(c)**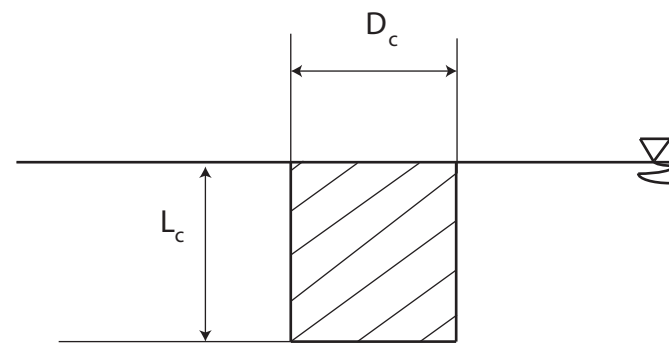**(d)**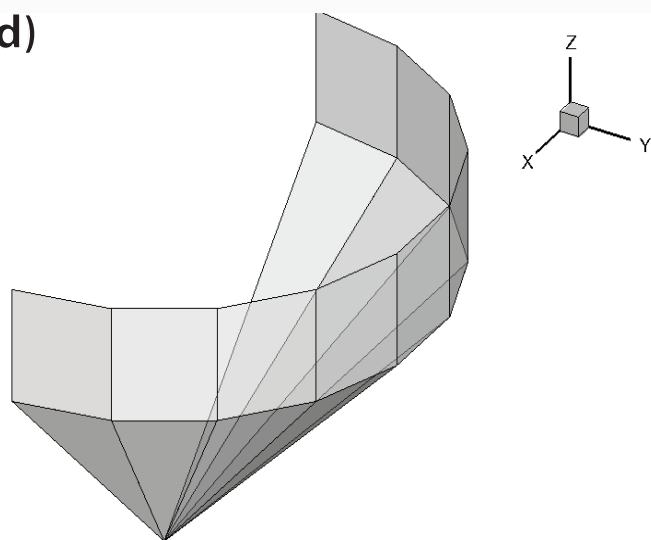**(e)**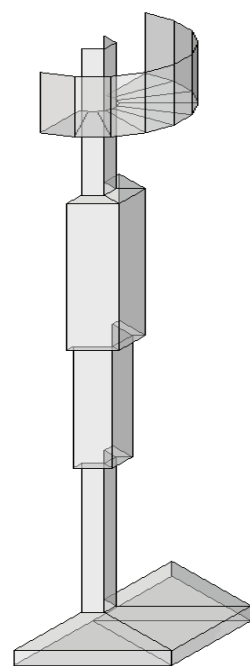**(f)**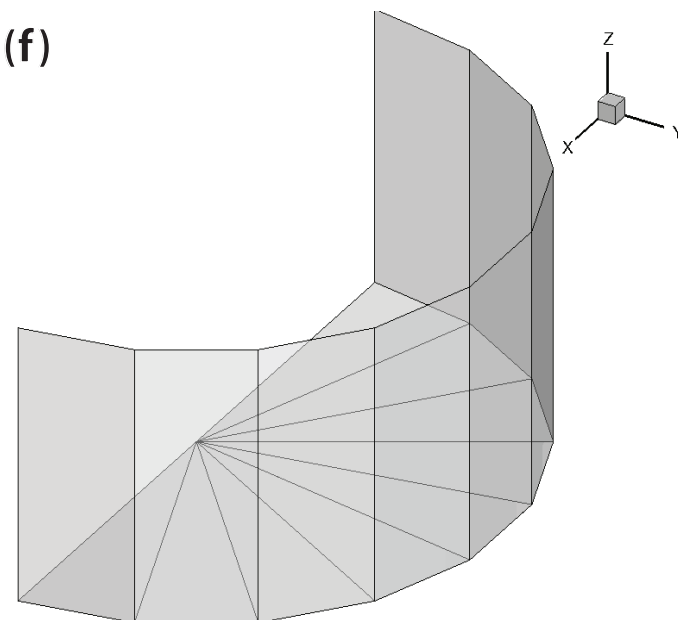

Supplement: Supplementary file 22 [file supplementary]

(1)

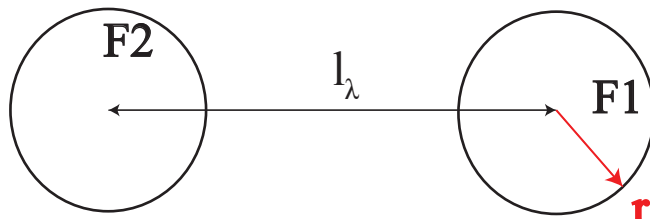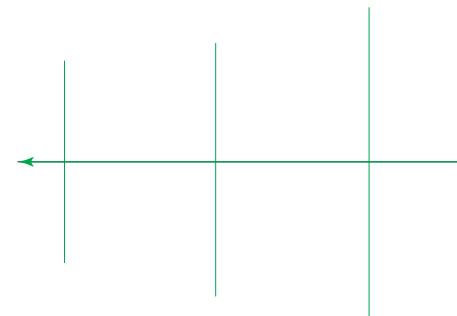

(2)

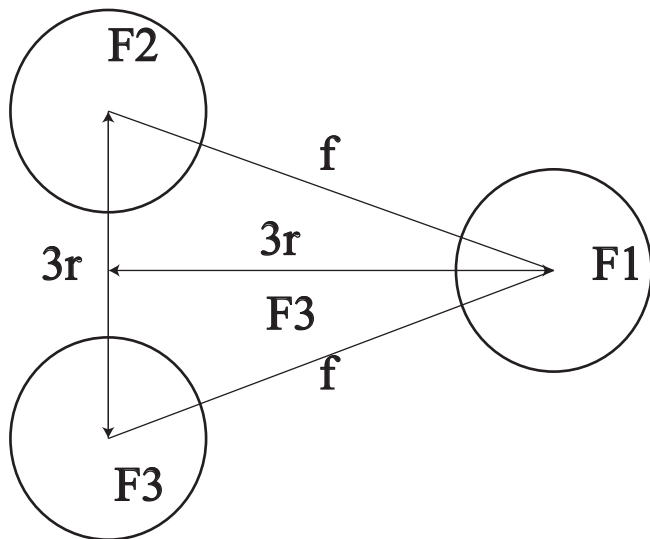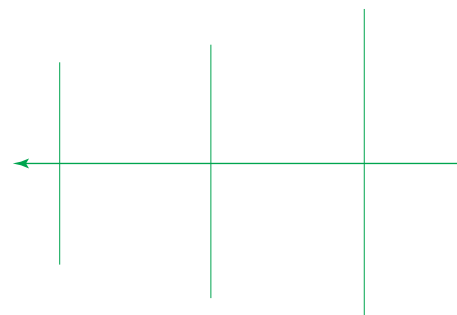

(3)

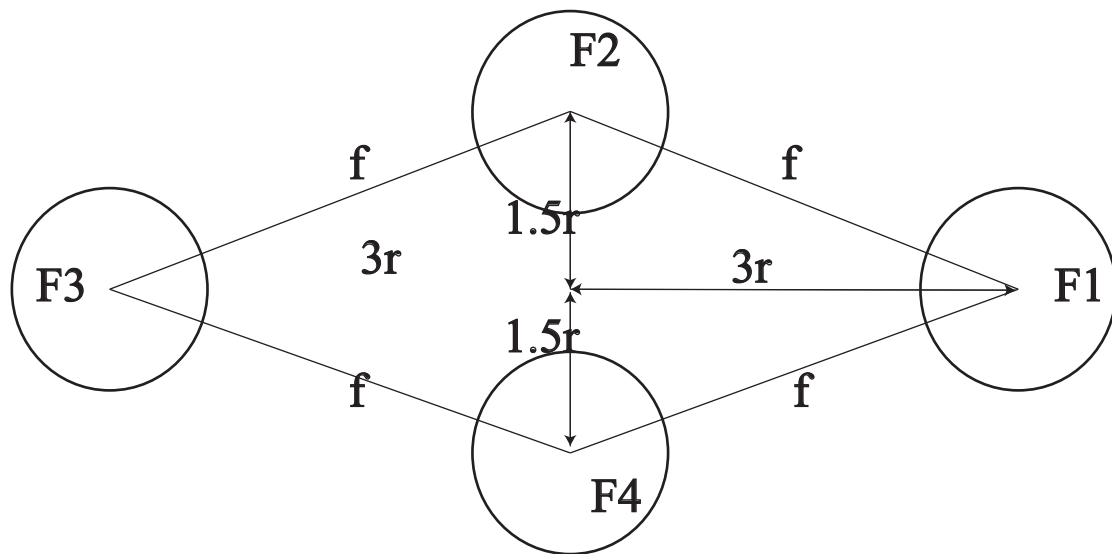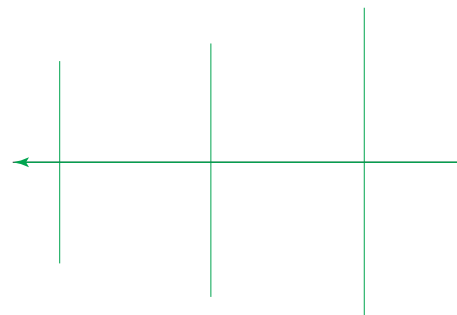

Supplement: Supplementary file 24 [file supplementary]
